# Supplementary material for: A naturally occurring 22-amino acid fragment of human hemoglobin A inhibits autophagy and HIV-1
Source: PubMed Central journal article supplement (PMC11408460; doi:10.1007/s00018-024-05447-1), 2024-09-17

18042023\_1

ZQ LAB 2038

18-Apr-2023

HBA1\_Scr01\_120\_132\_Fr32 166 (9.662) Sm (SG, 2x0.50); Cm (165:172)

1: Scan ES+

5.58e6

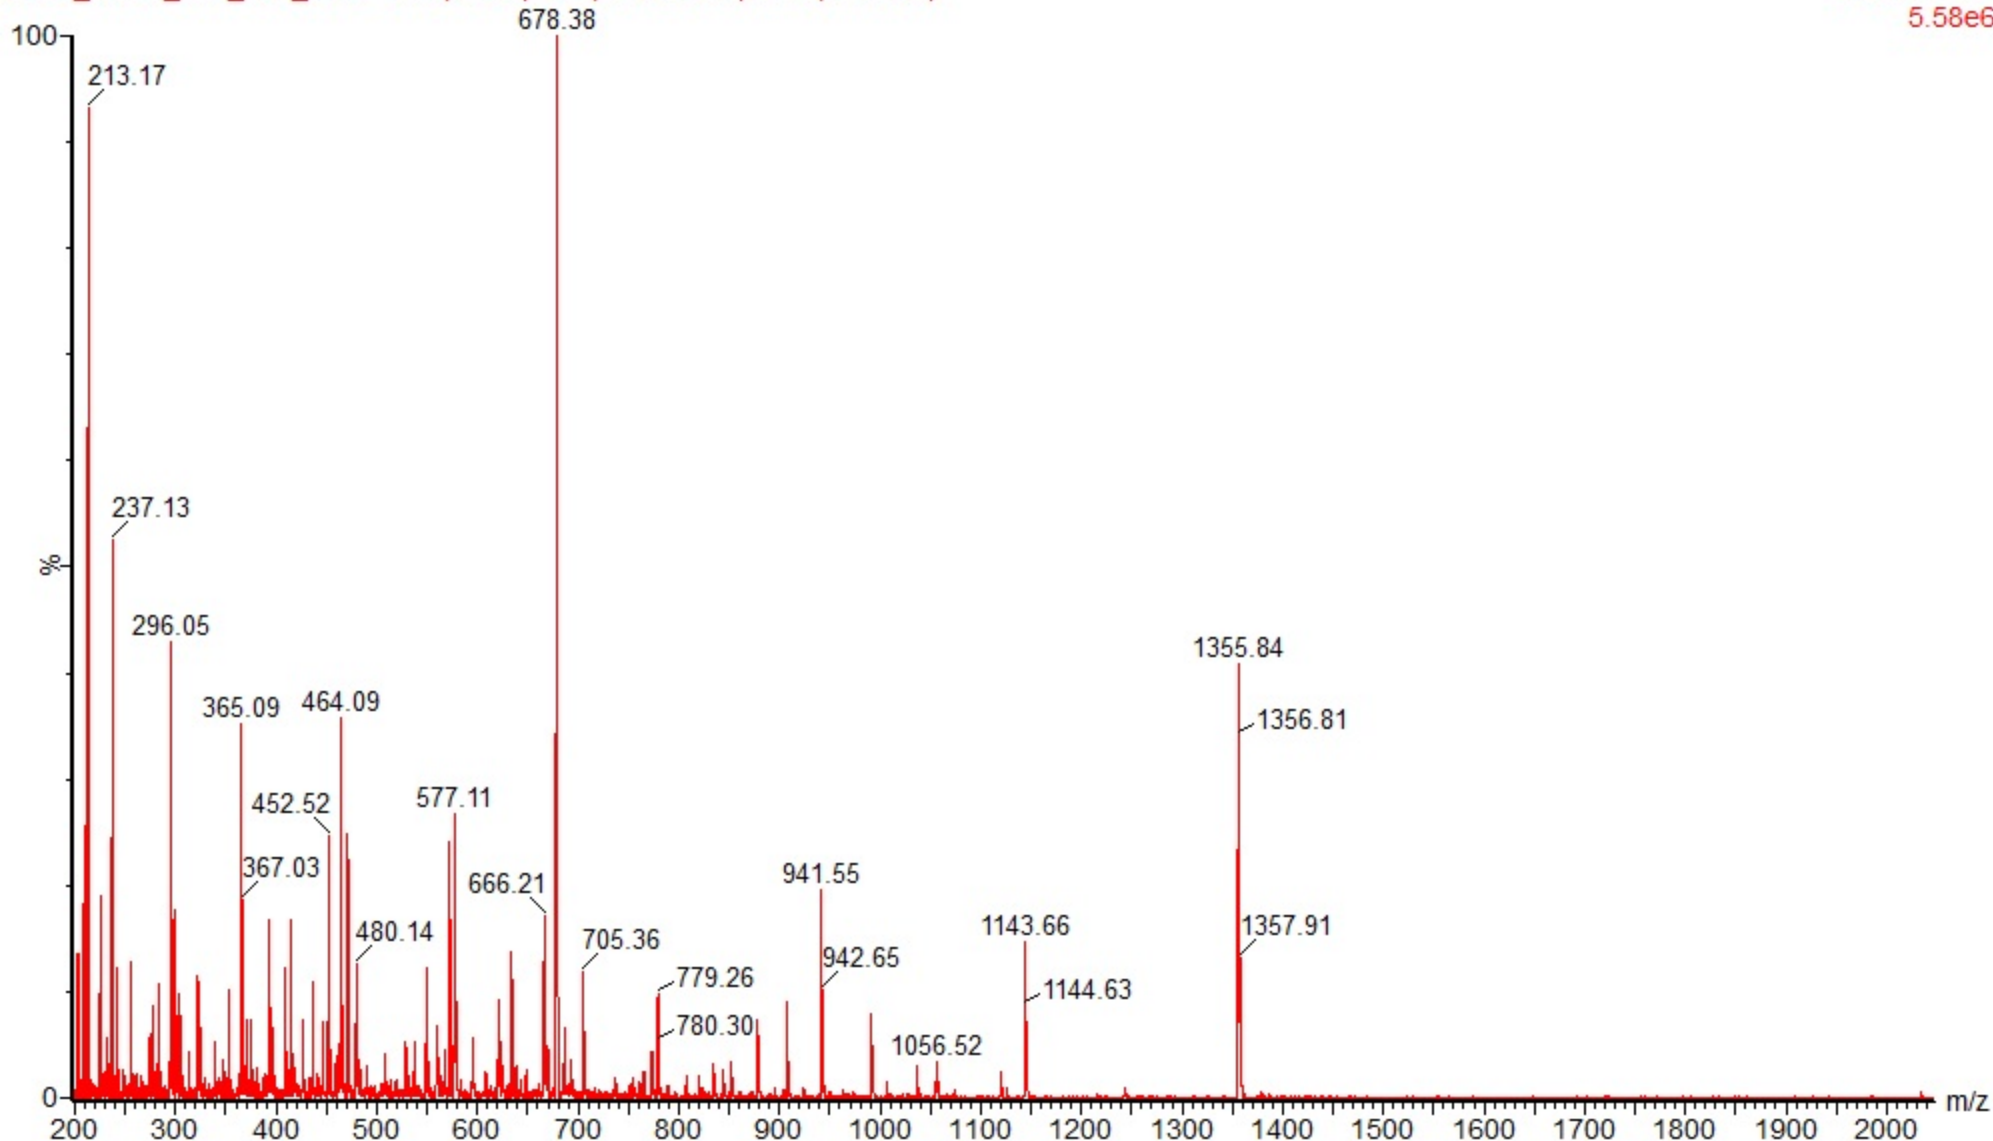

20220907\_6

ZQ LAB 2038

07-Sep-2022

hem\_a\_111\_132\_S4\_Fr38 208 (12.112) Cm (206:215)

1: Scan ES+  
1.30e7

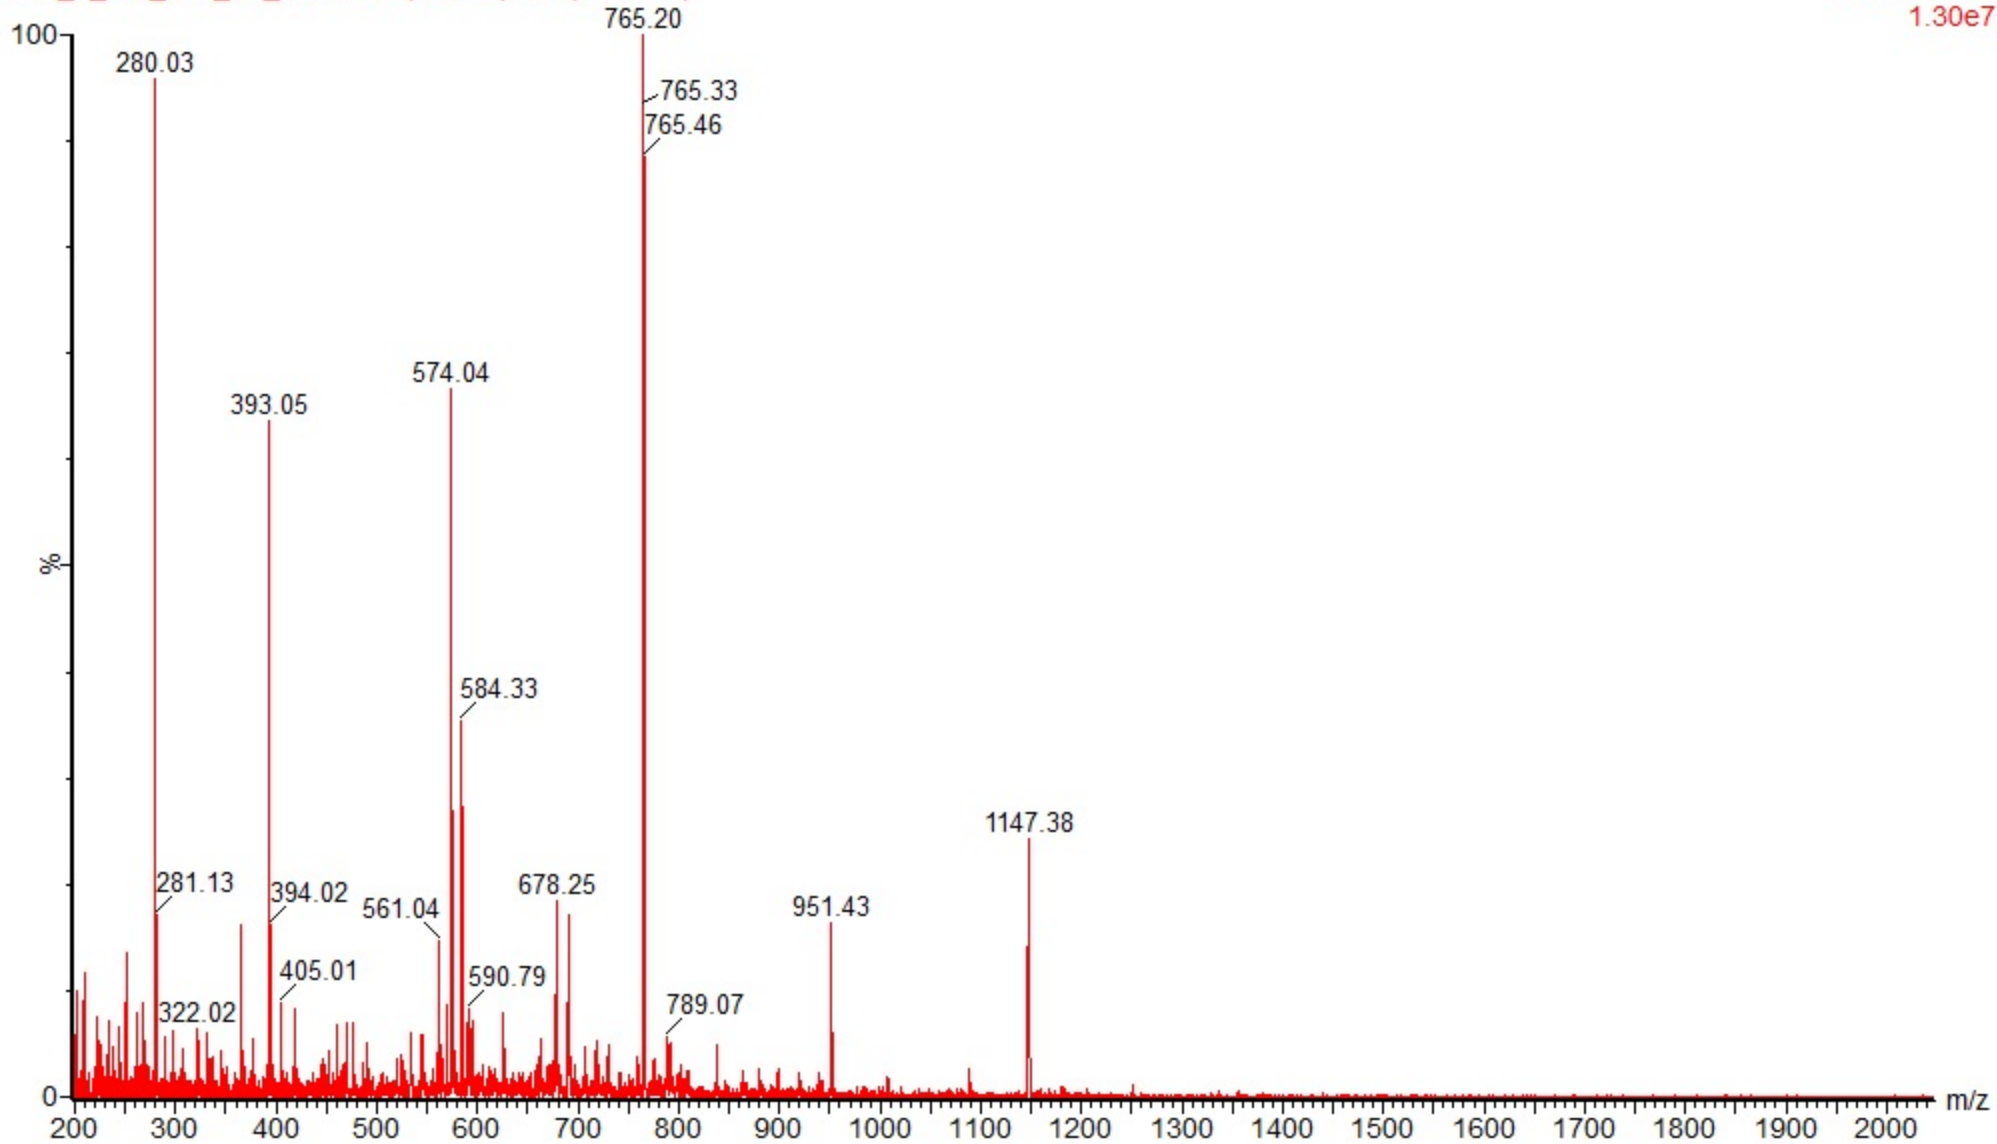

20240816\_3

ZQ LAB 2038

16-Aug-2024

HBA1\_116\_132\_Fr30 203 (11.820) Sm (SG, 2x0.50); Sm (SG, 2x0.50); Cm (202:203)

1: Scan ES+  
9.14e6

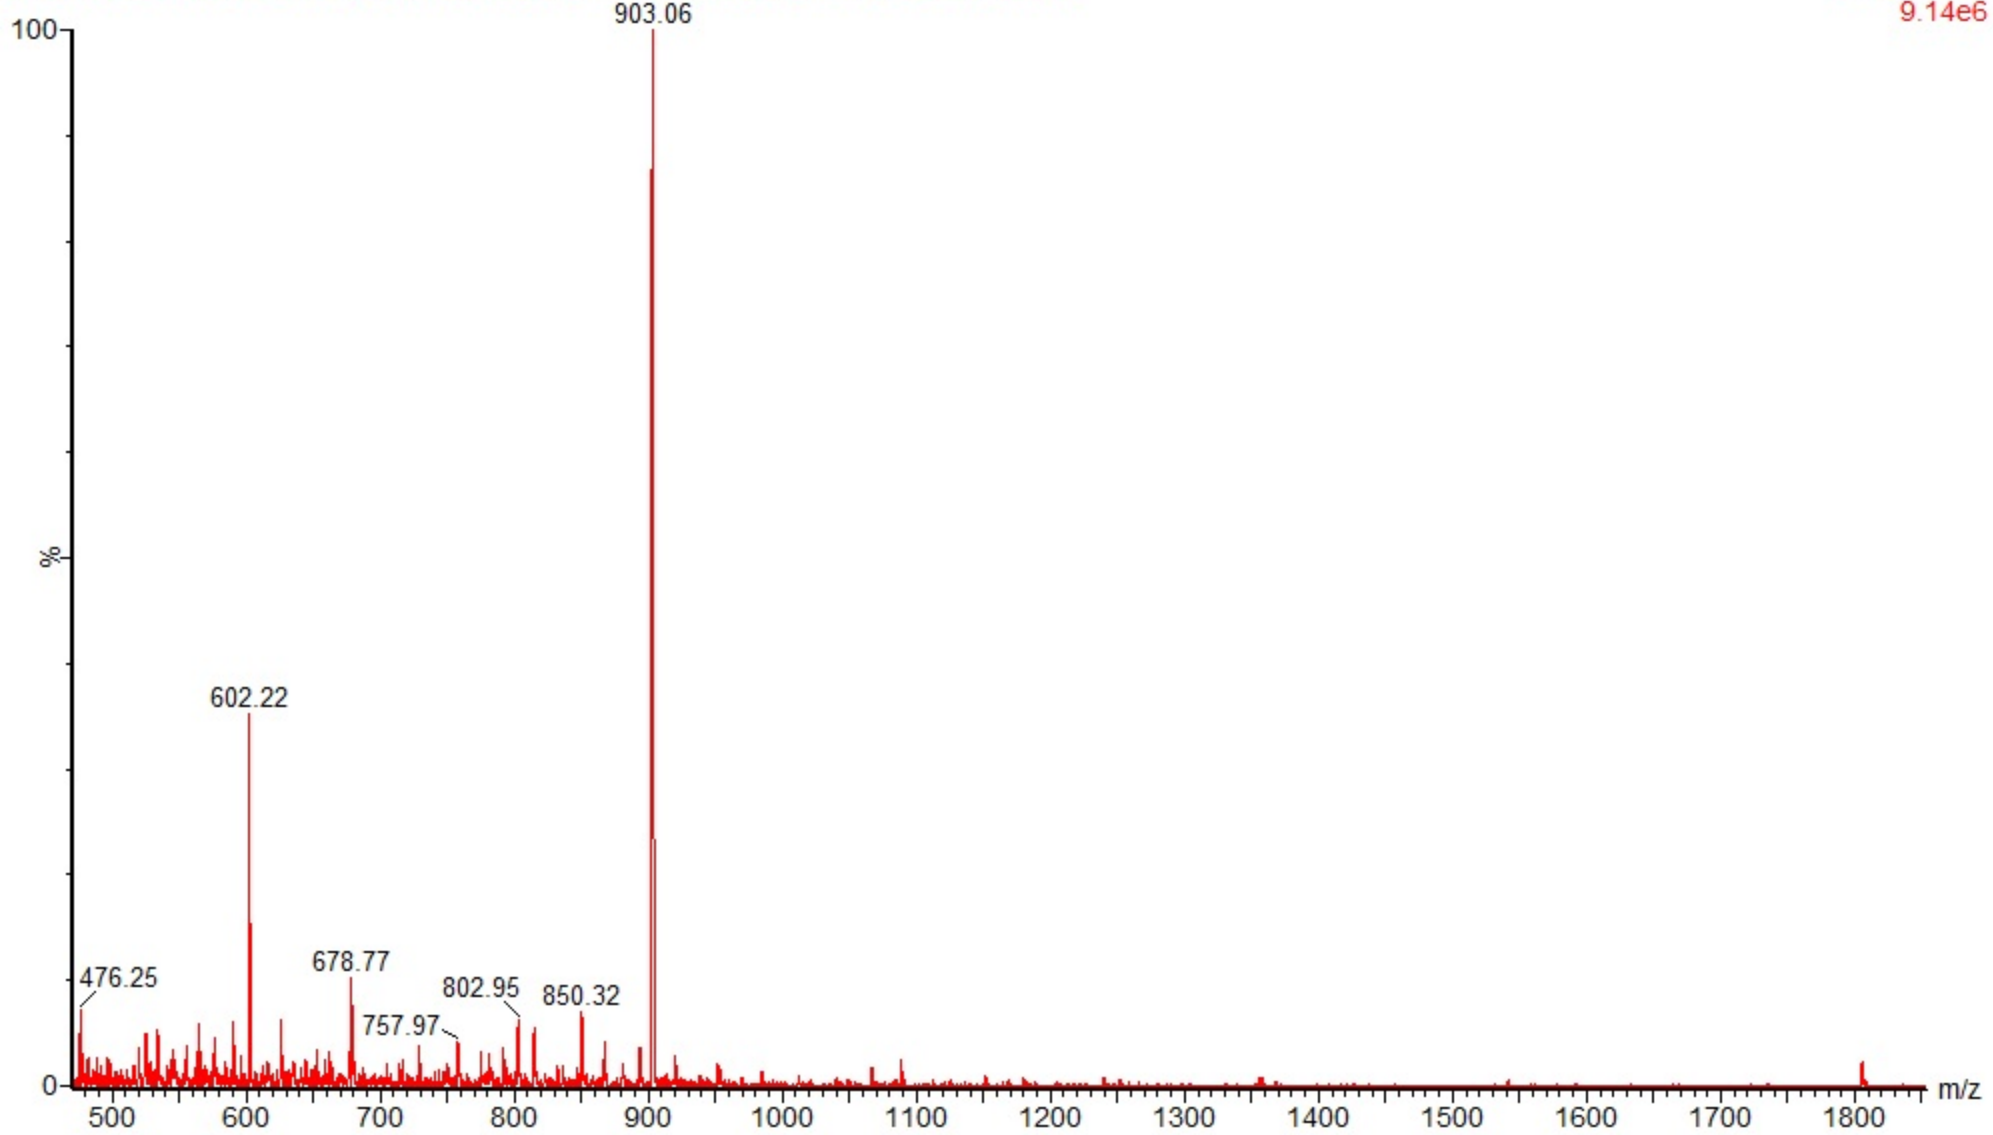

20240815\_1

ZQ LAB 2038

16-Aug-2024

HBA1\_118\_132\_Fr28 181 (10.537) Sm (SG, 2x0.50); Sm (SG, 2x0.50); Cm (179:186)

1: Scan ES+  
8.37e6

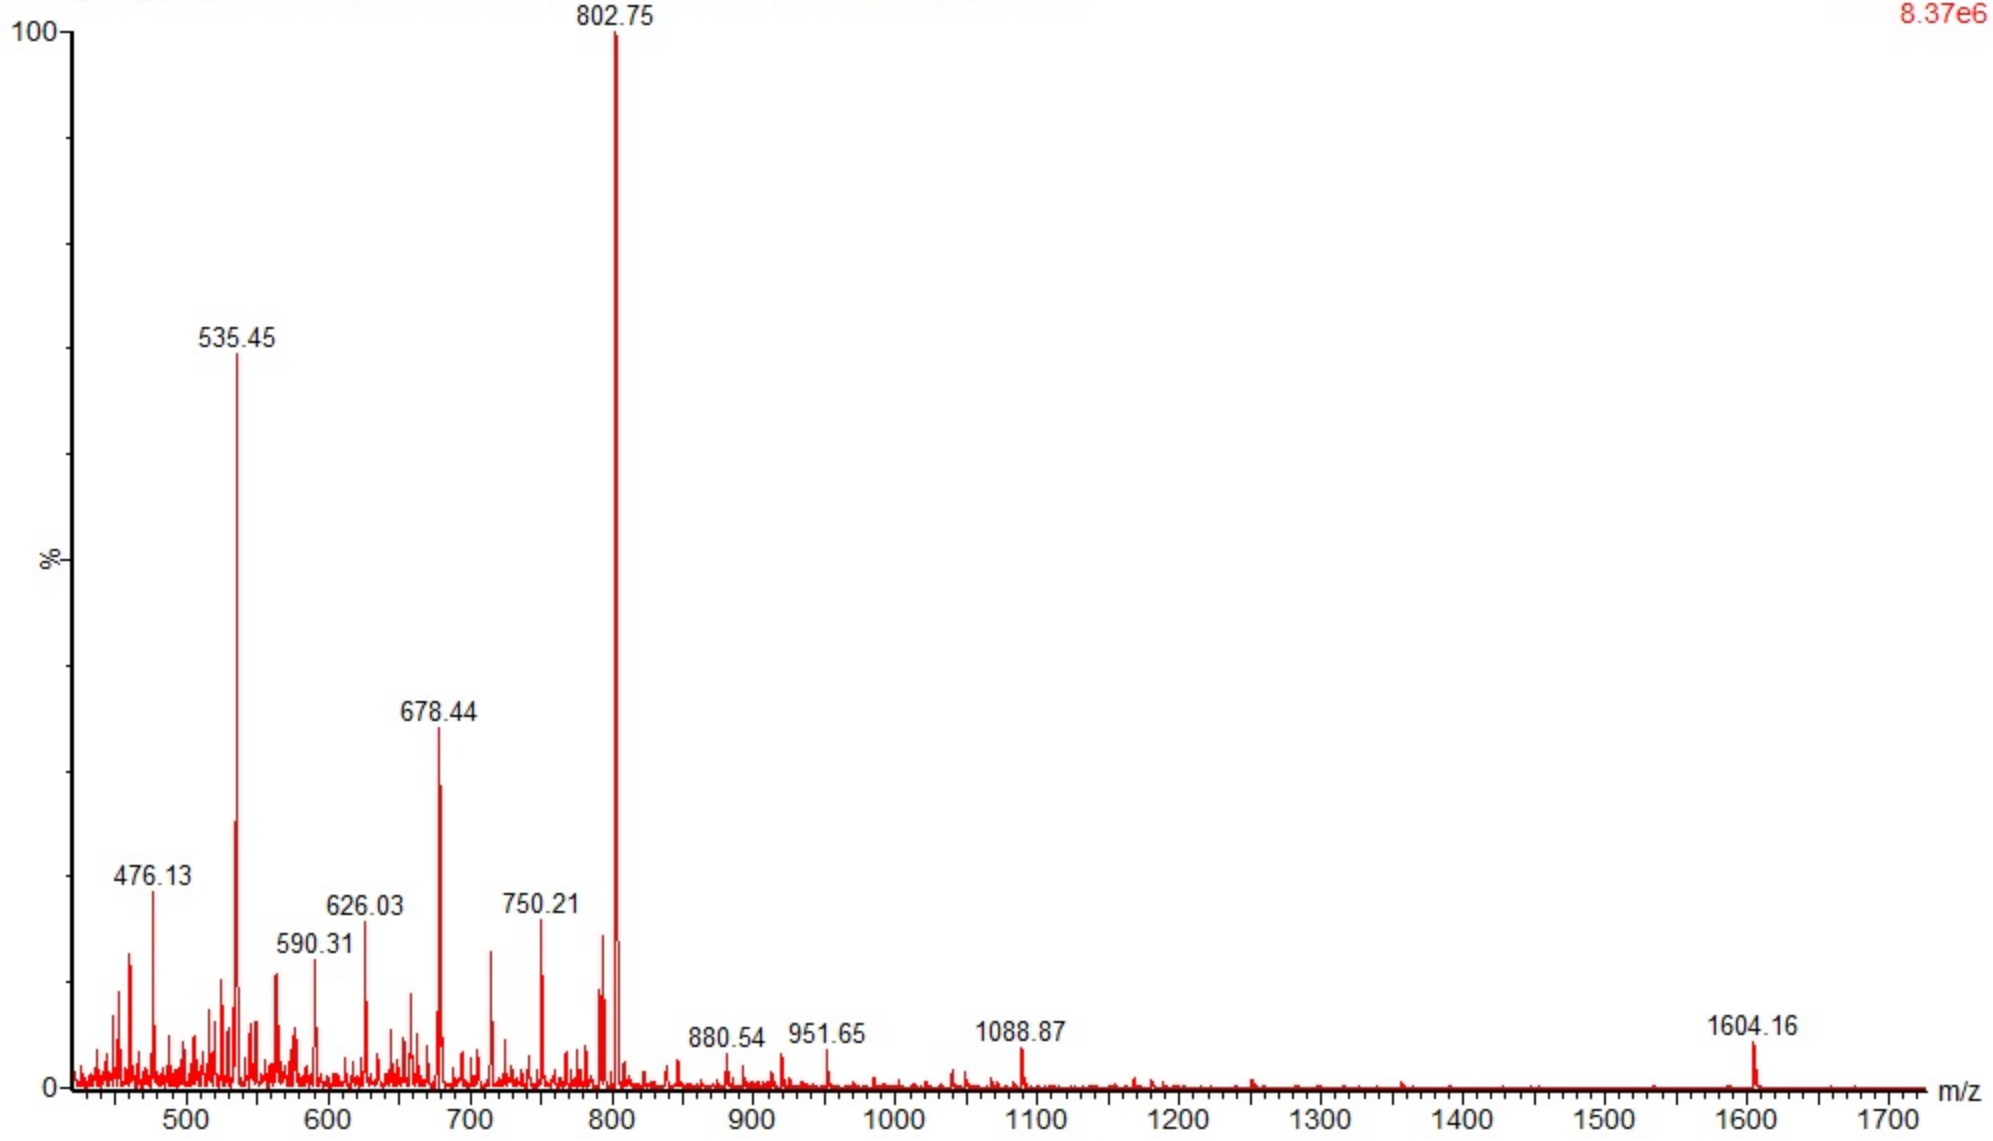

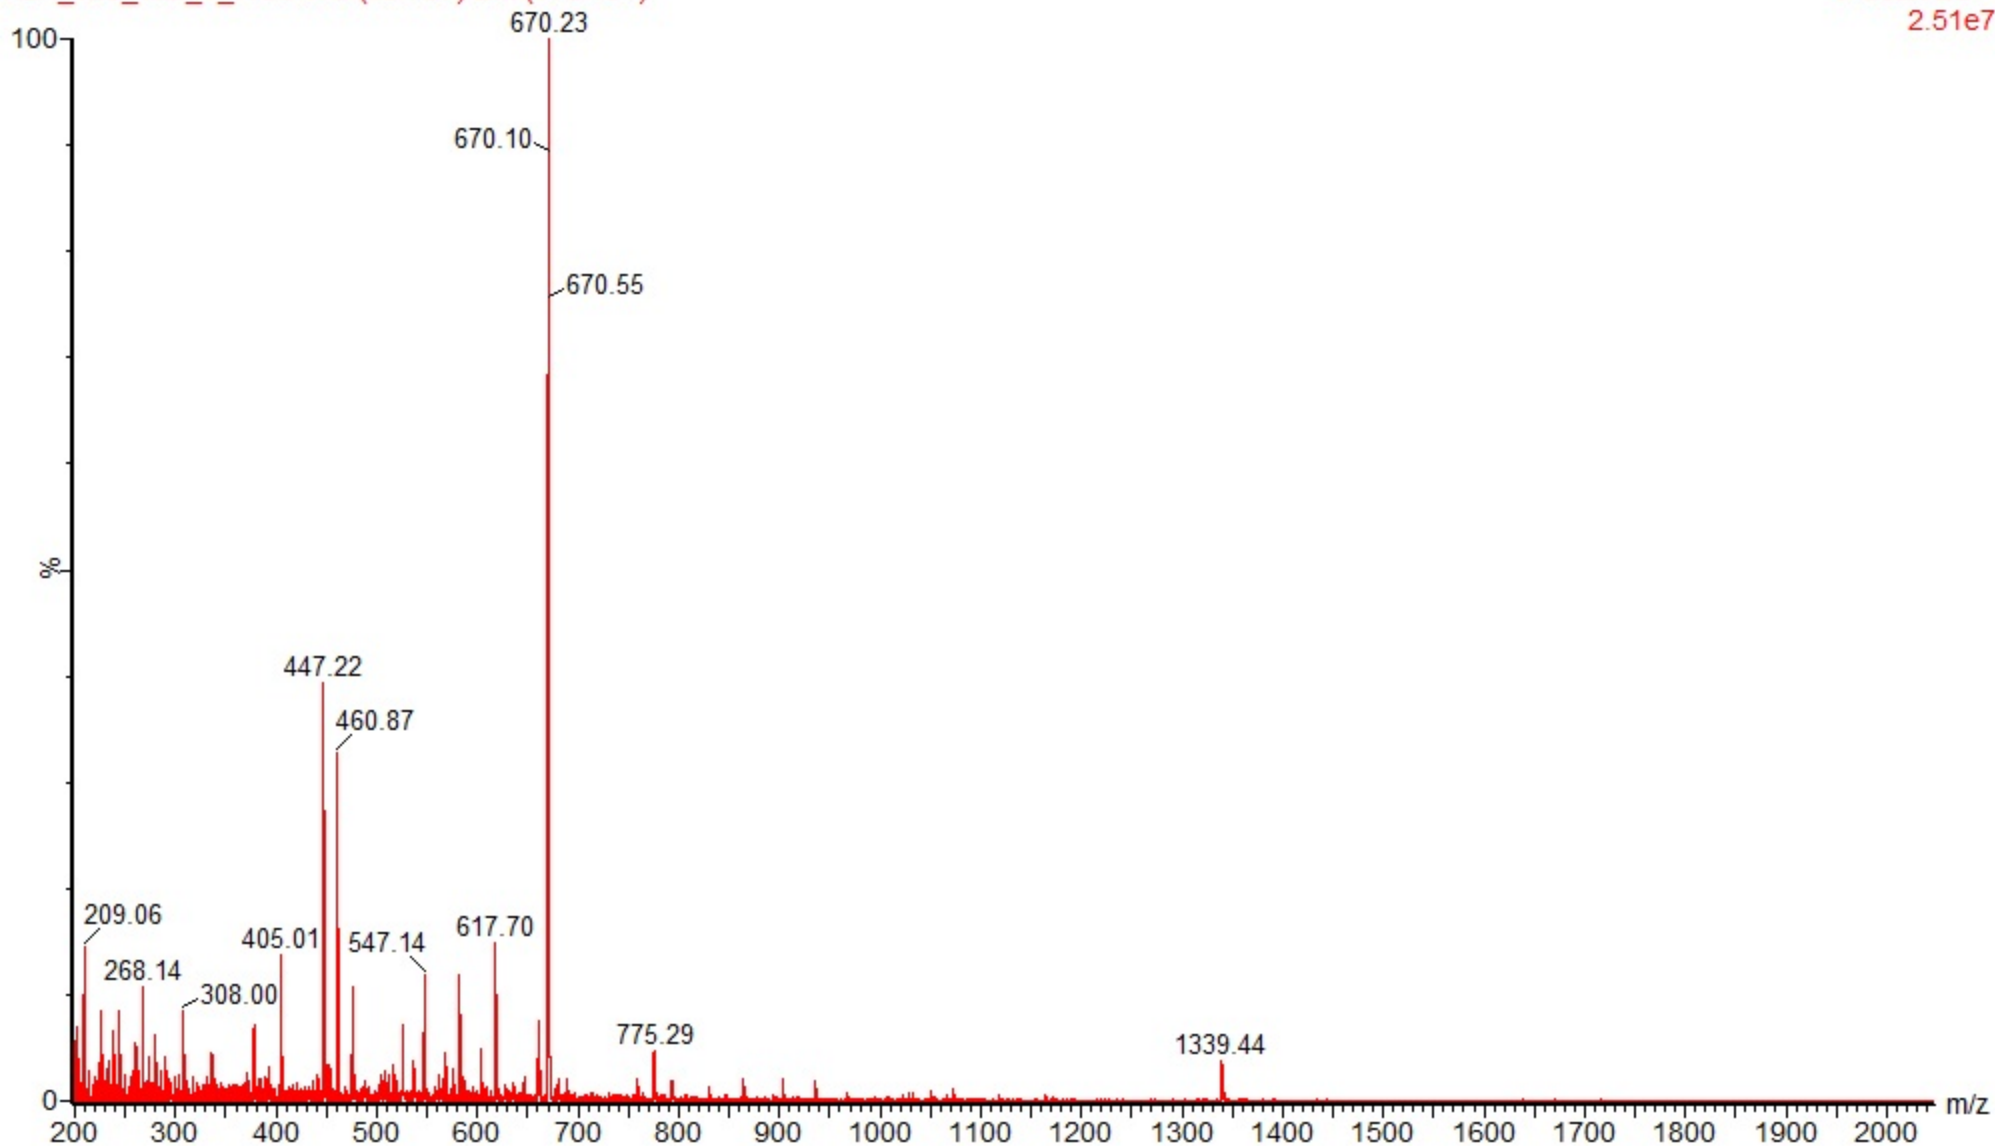

HBA1\_ASP\_Fr36 174 (10.128) Cm (170:184)

1: Scan ES+

1.42e7

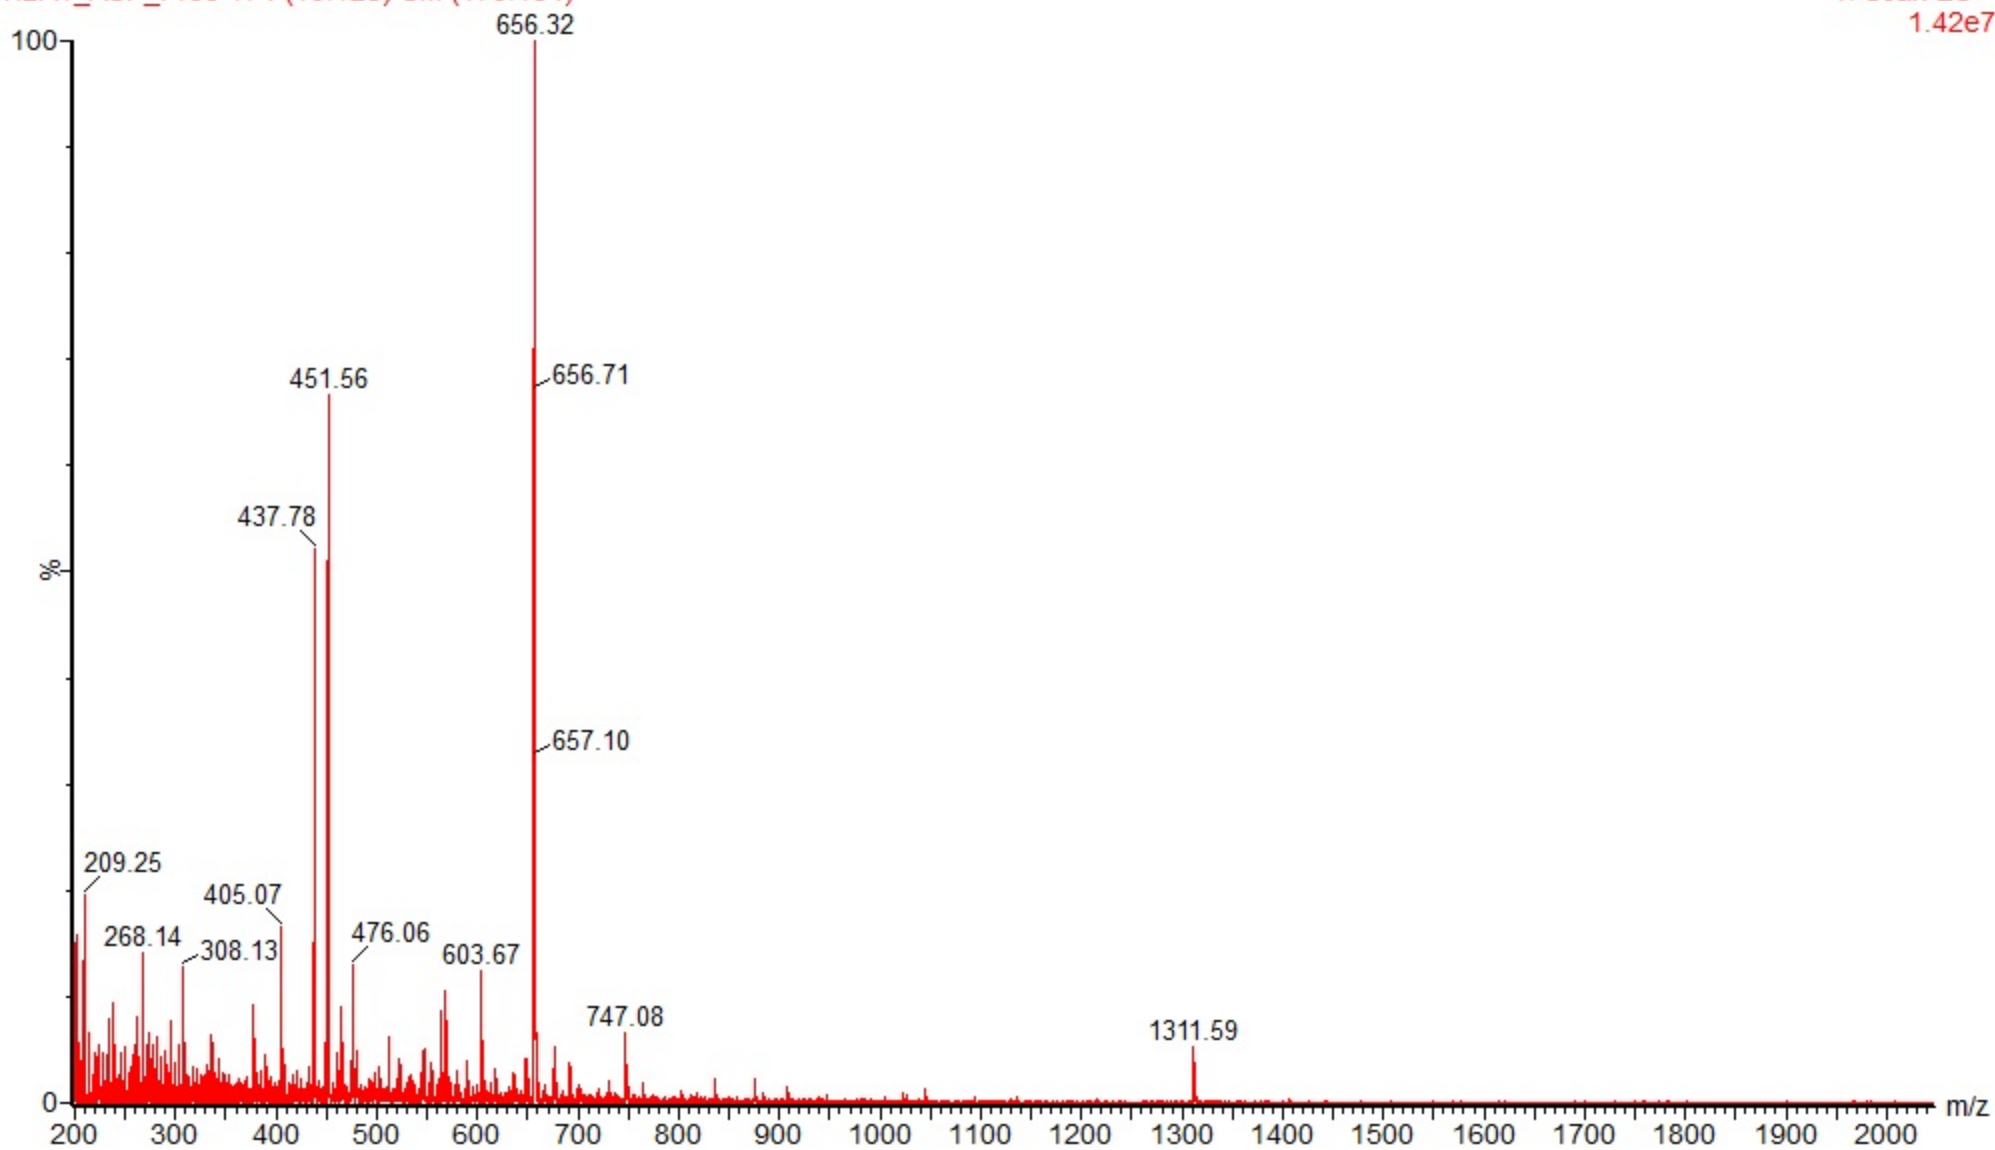

HBA1\_DK\_Fr40 207 (12.053) Cm (204:214)

1: Scan ES+

7.47e6

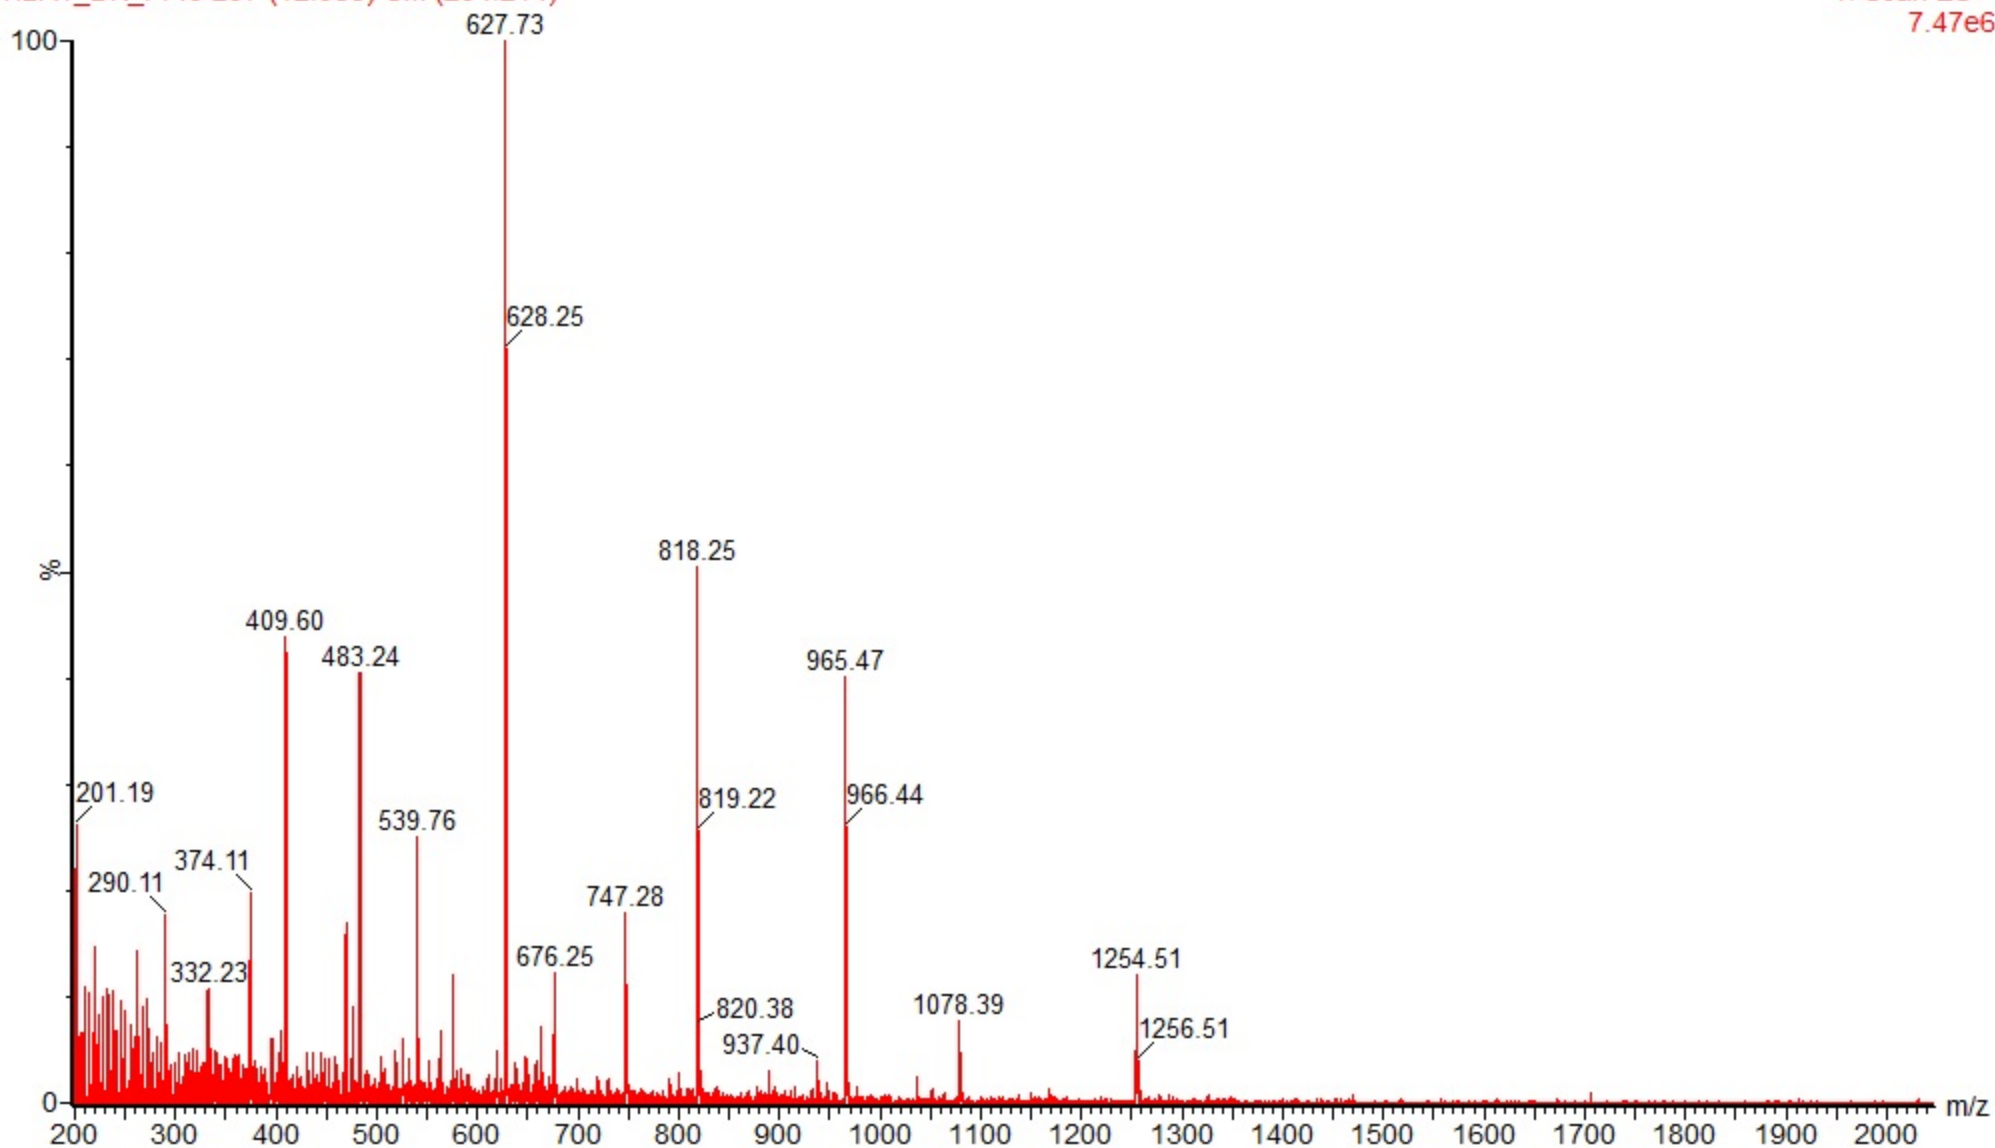

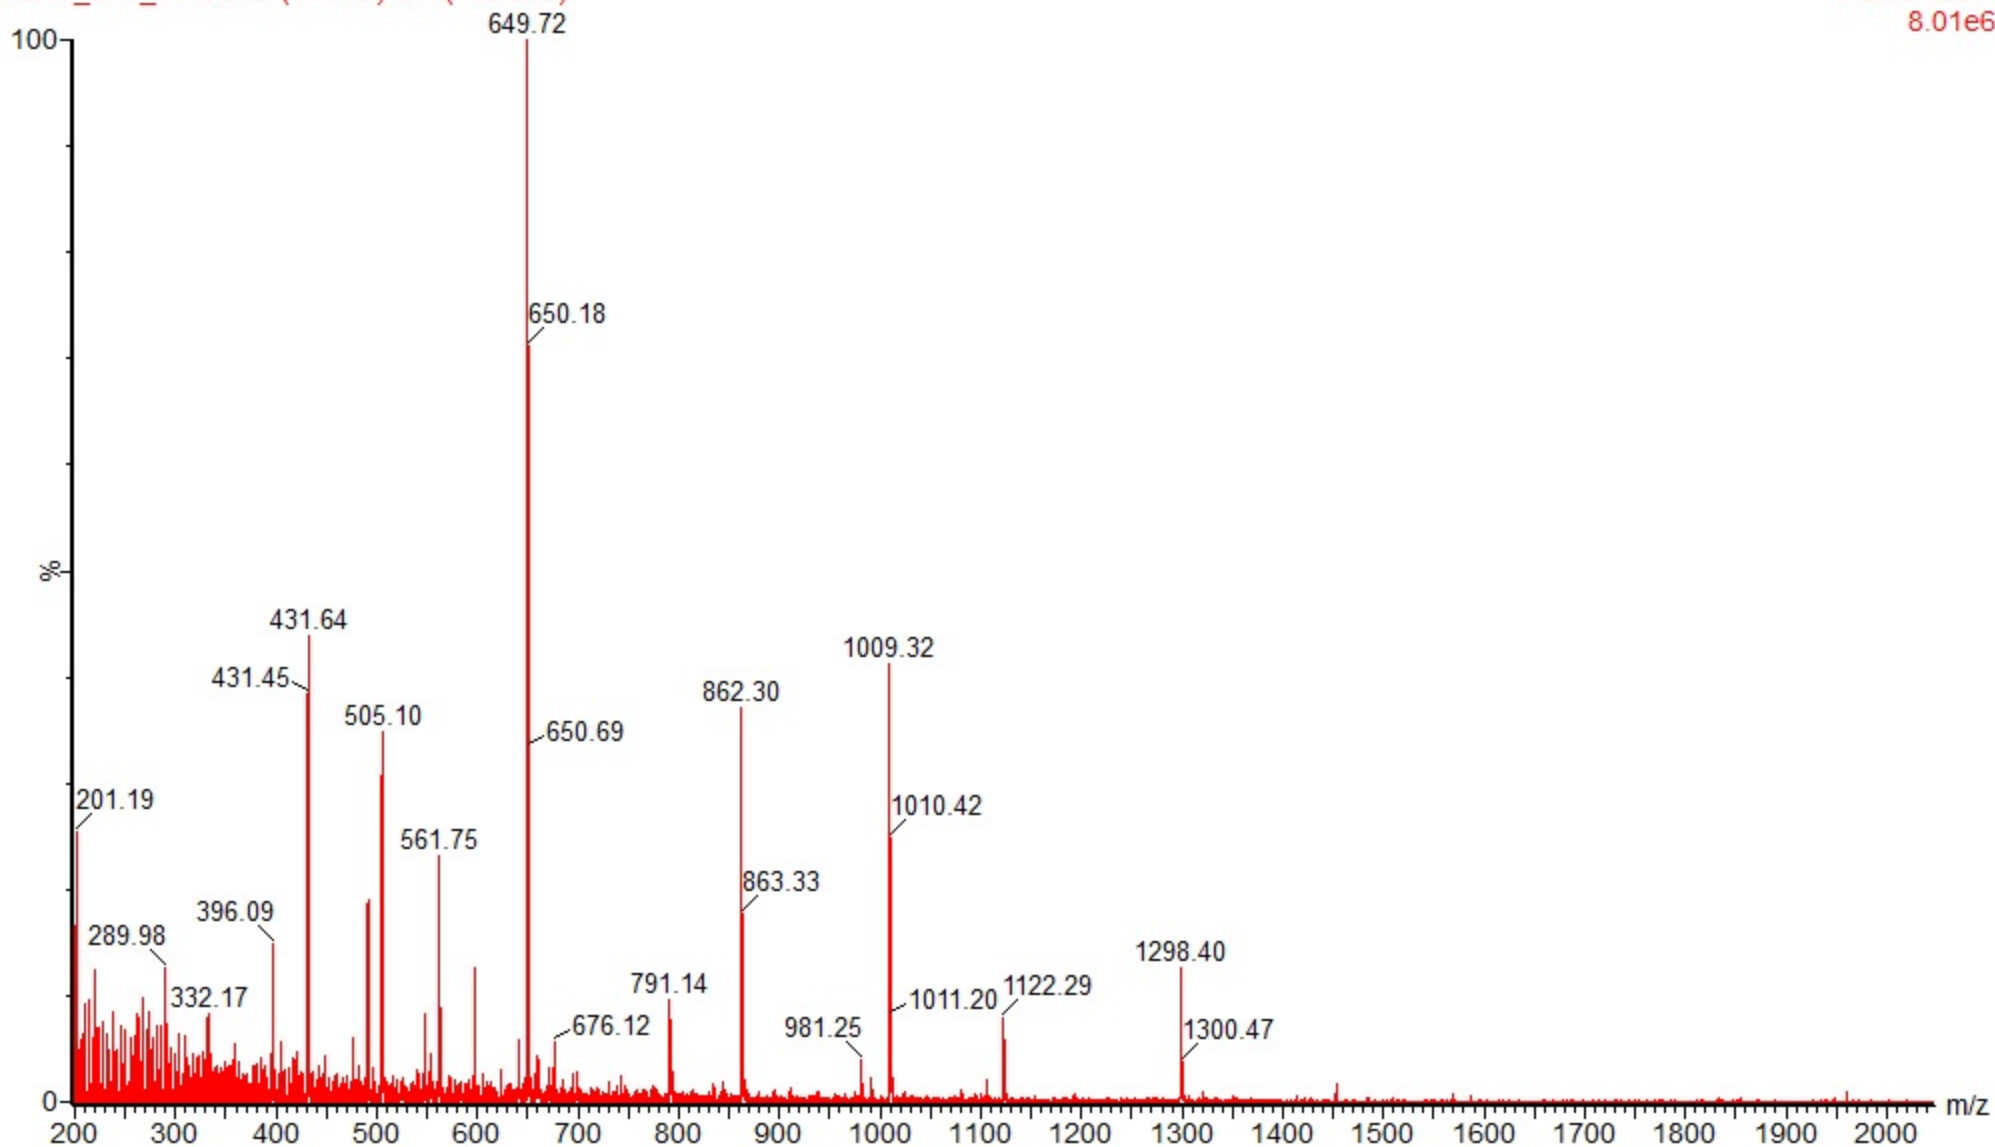



20221107\_8

ZQ LAB 2038

07-Nov-2022

HBA\_120\_132\_1\_Fr35 175 (10.187) Cm (171:184)

1: Scan ES+  
1.62e7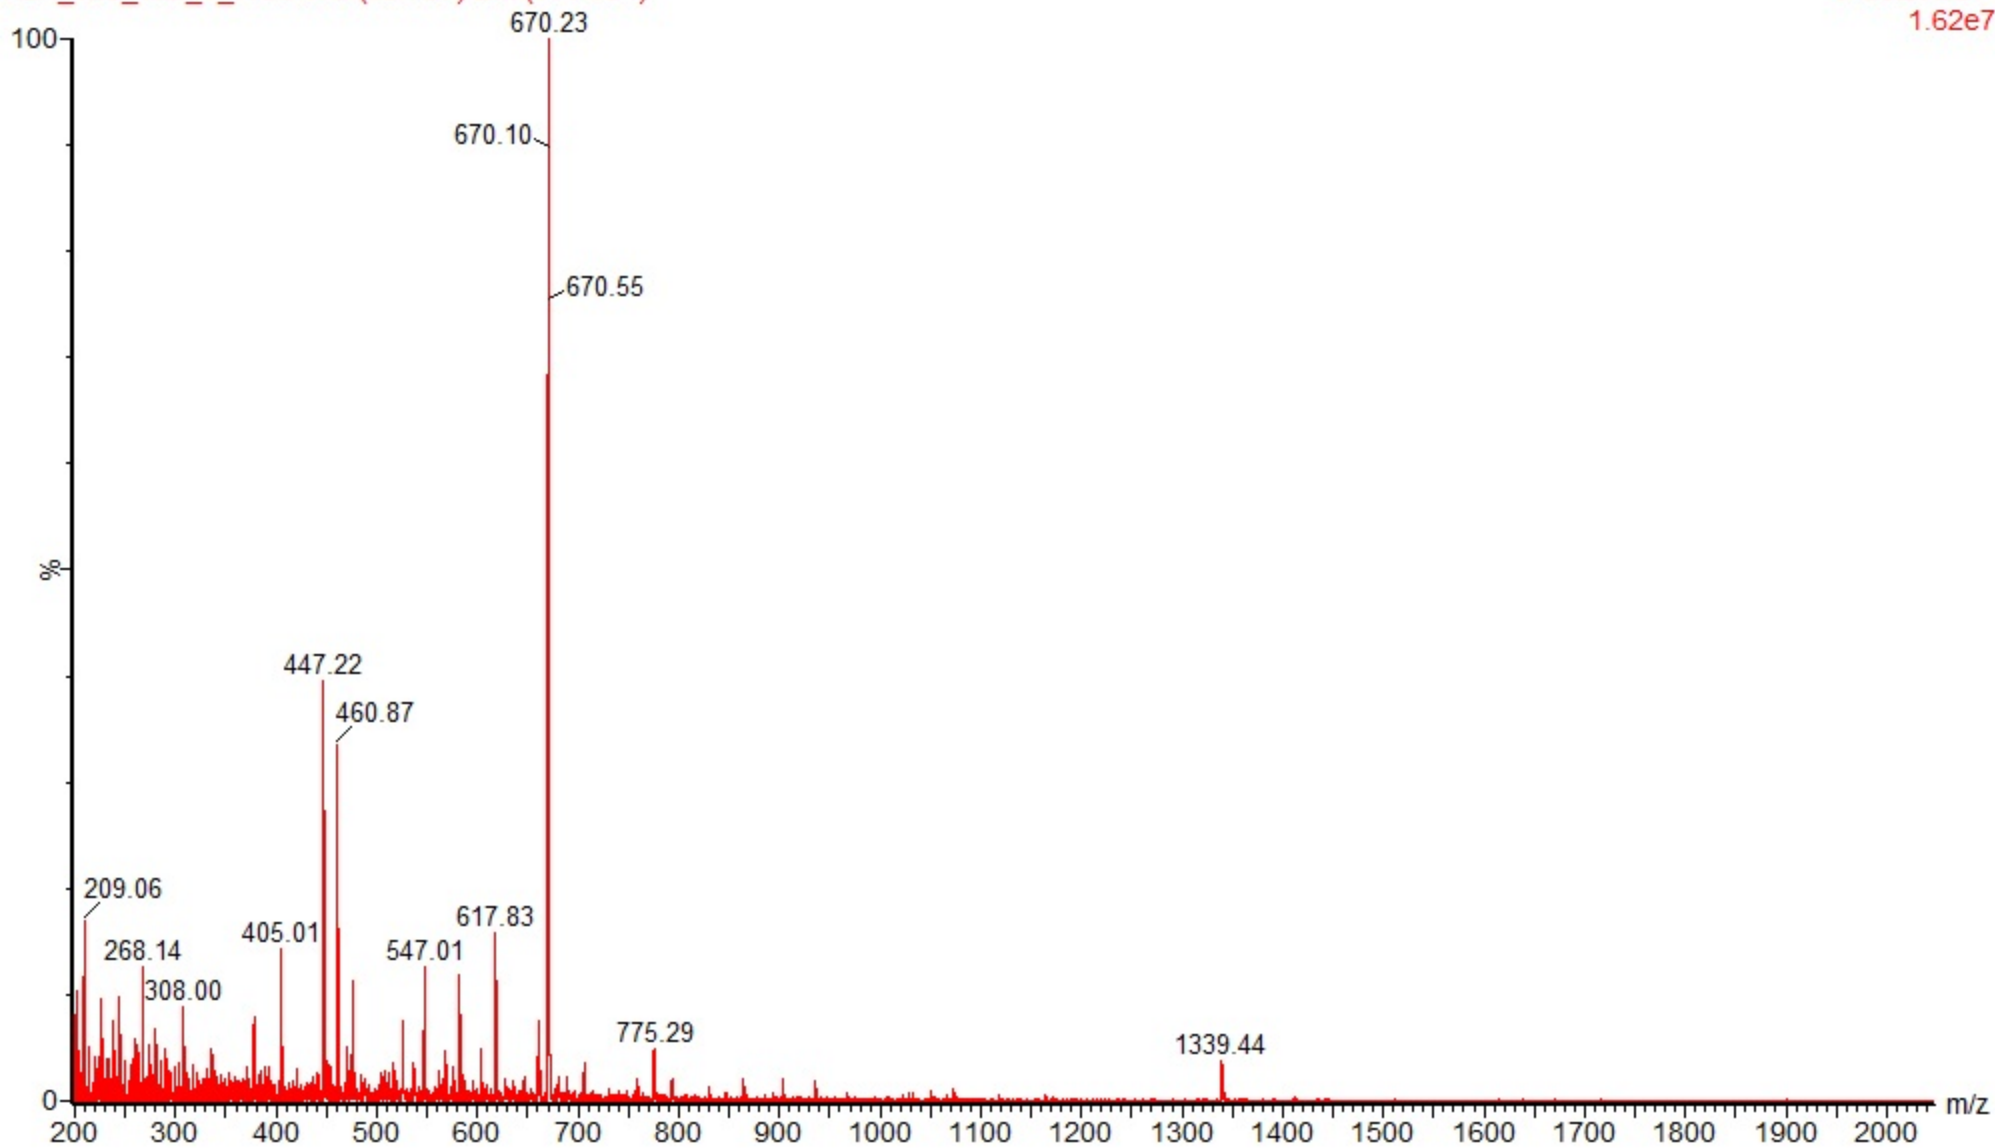

HBA1\_S\_Roh 182 (10.595) Cm (179:186)

1: Scan ES+

1.11e7

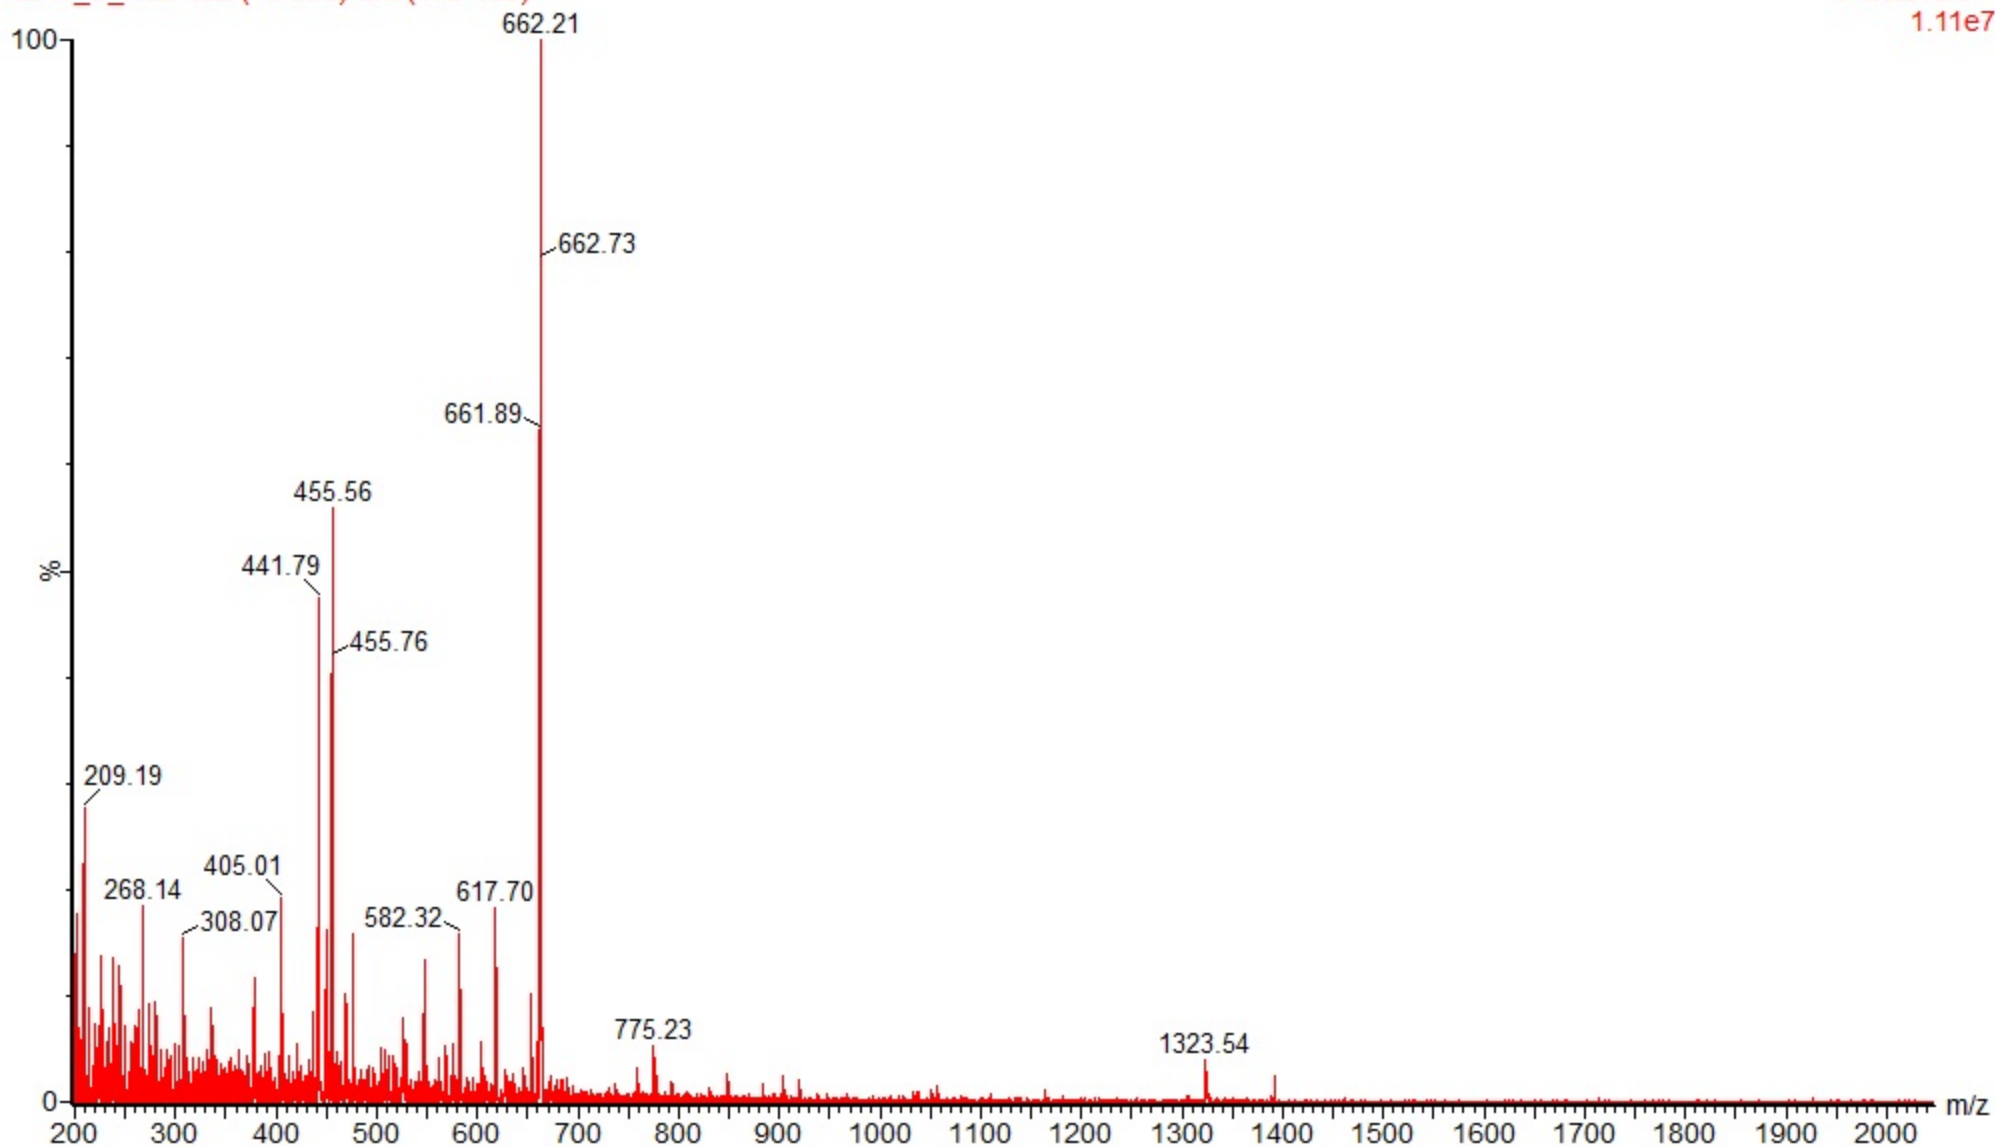

20221107\_9

ZQ LAB 2038

07-Nov-2022

HBA\_120\_132\_2\_Fr35 177 (10.303) Cm (175:183)

1: Scan ES+

7.49e6

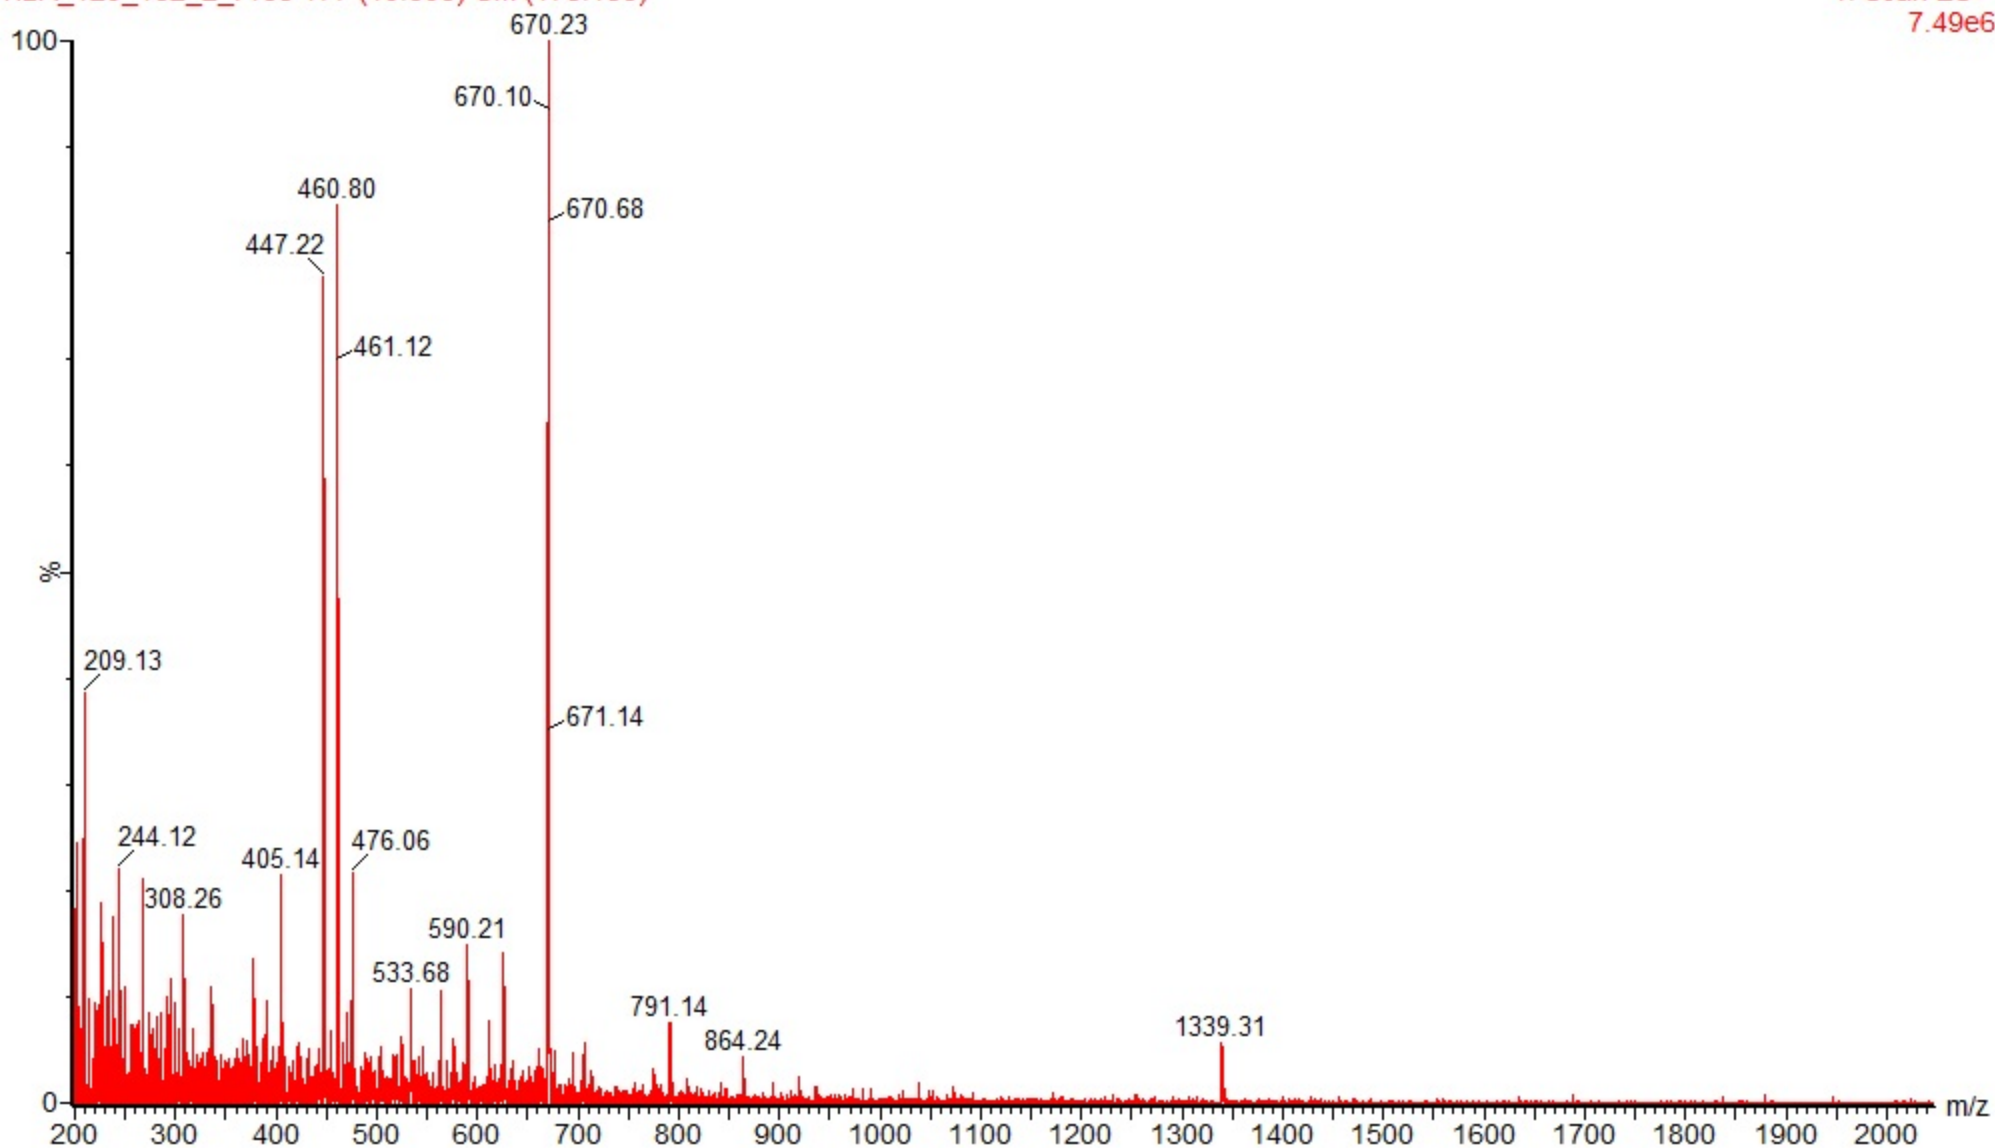

20181128\_1

ZQ LAB 2038

28-Nov-2018

hem\_a\_111\_131\_Fr38re\_Fr33\_3 268 (12.057) Sm (SG, 2x0.50); Cm (265:279)

1: Scan ES+  
2.30e6

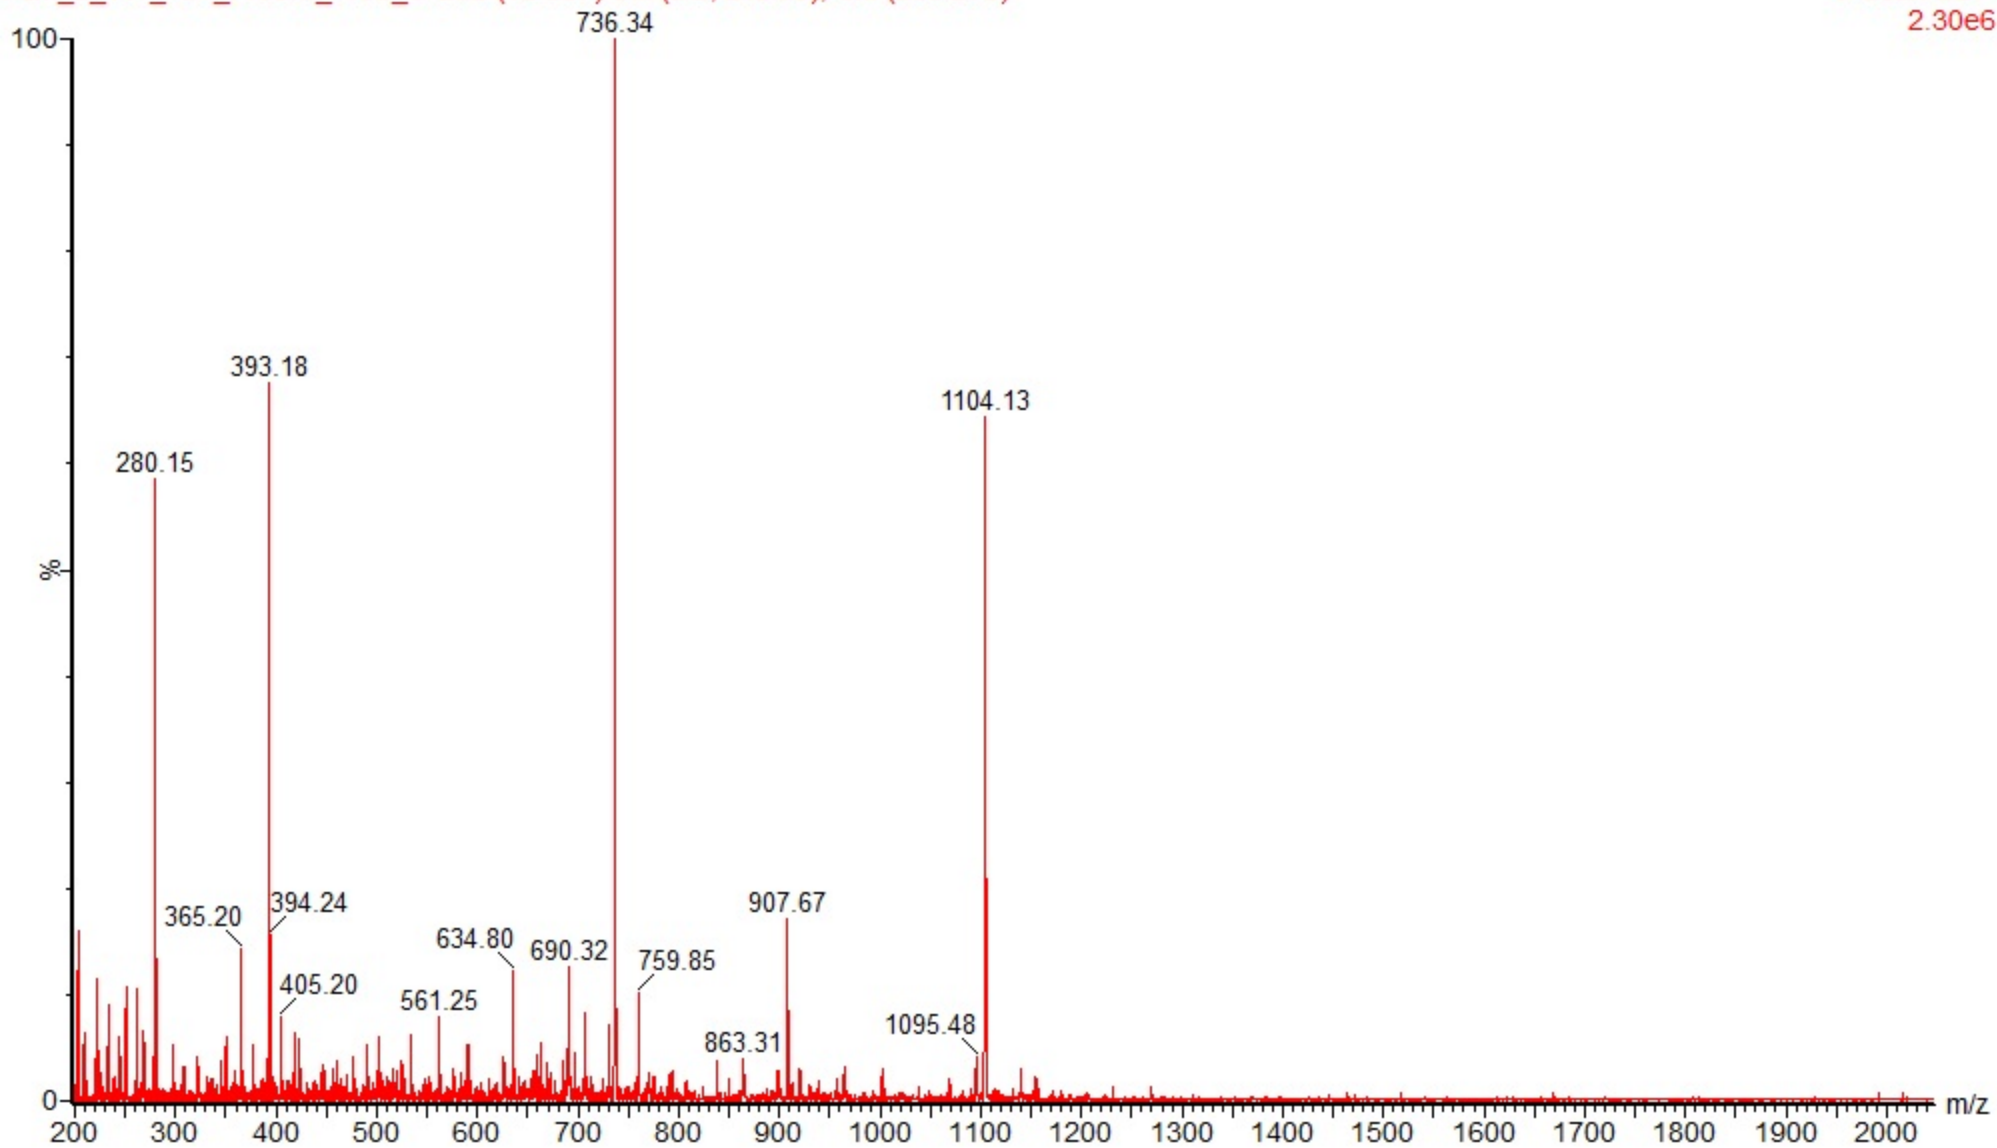

20190211\_1

ZQ LAB 2038

11-Feb-2019

hem\_a\_112\_130\_Fr40 255 (11.472) Cm (251:272)

1: Scan ES+  
2.91e7

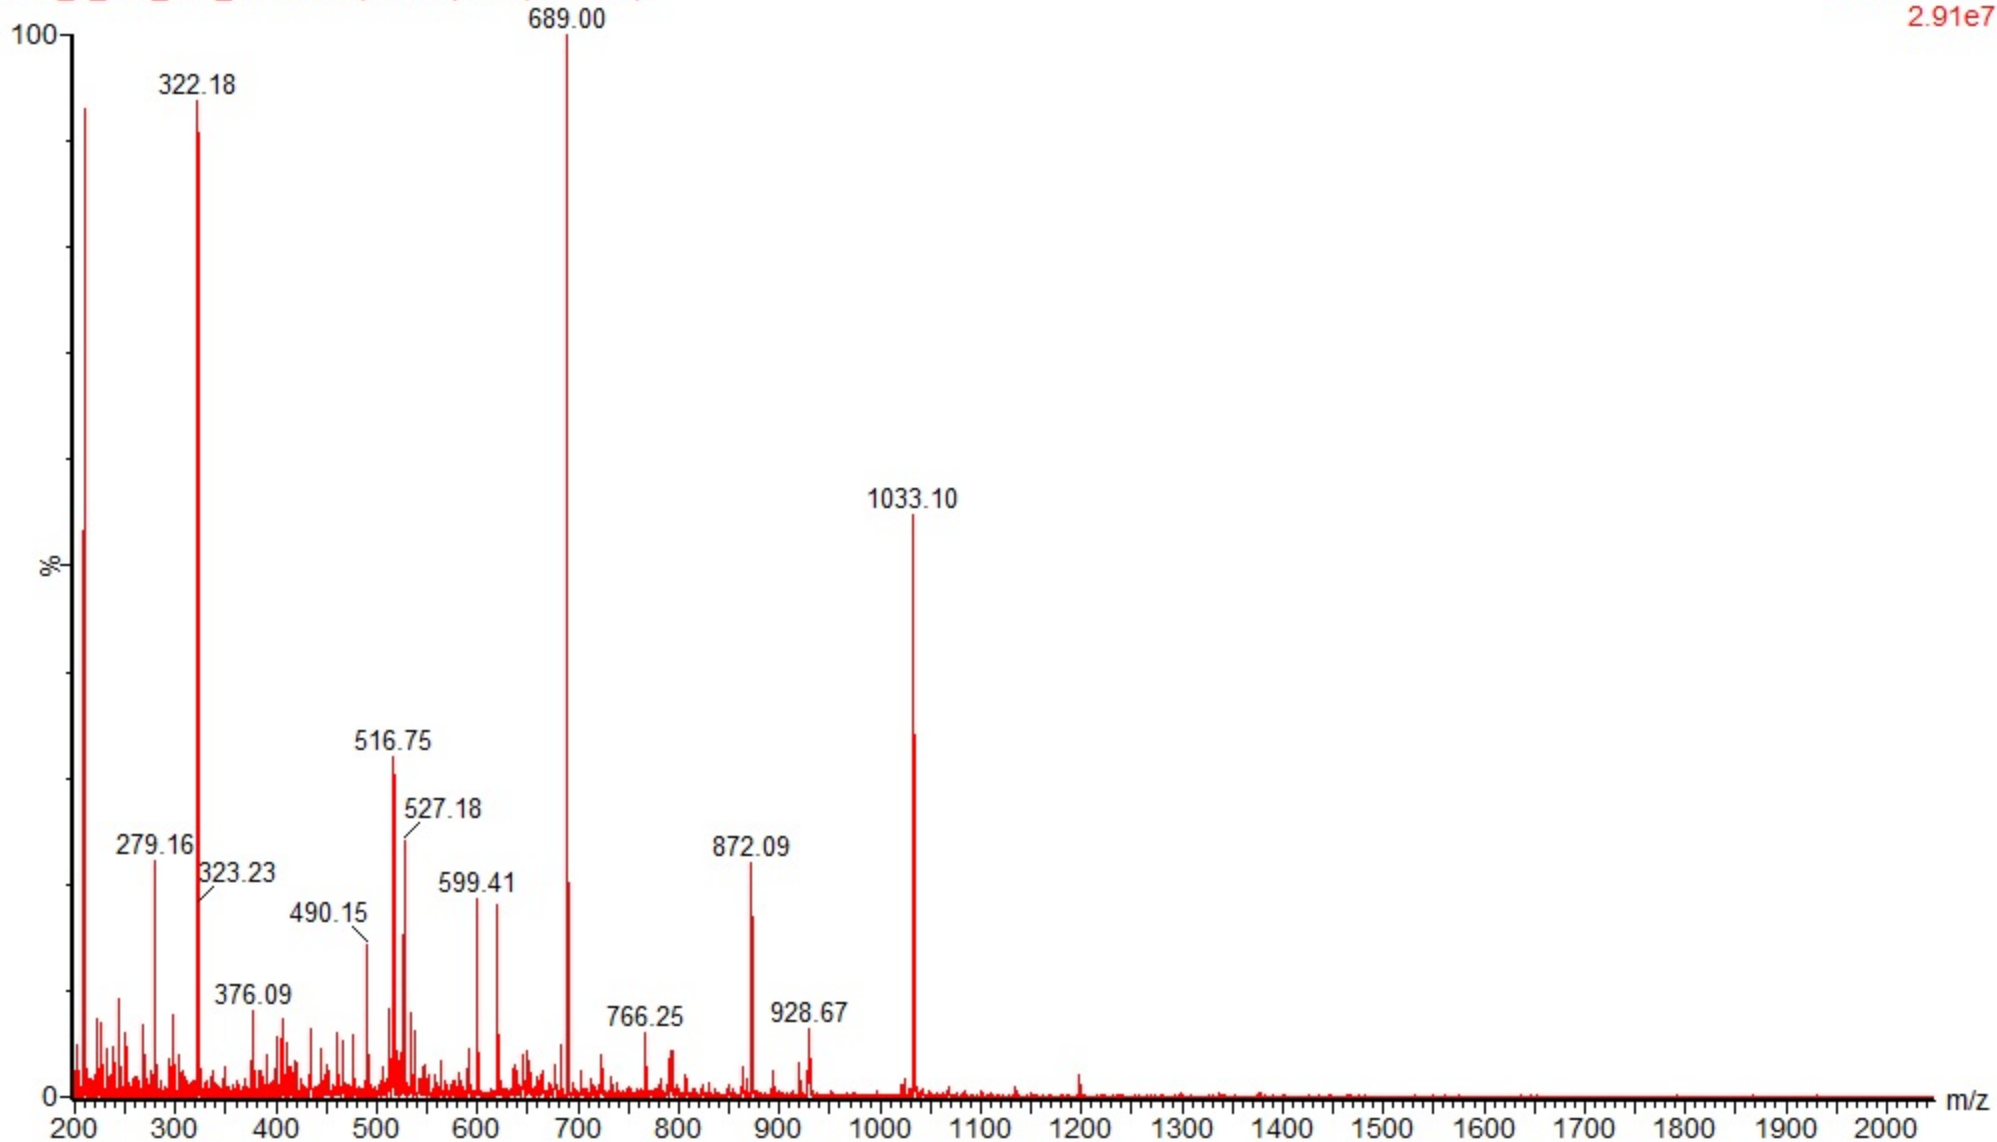

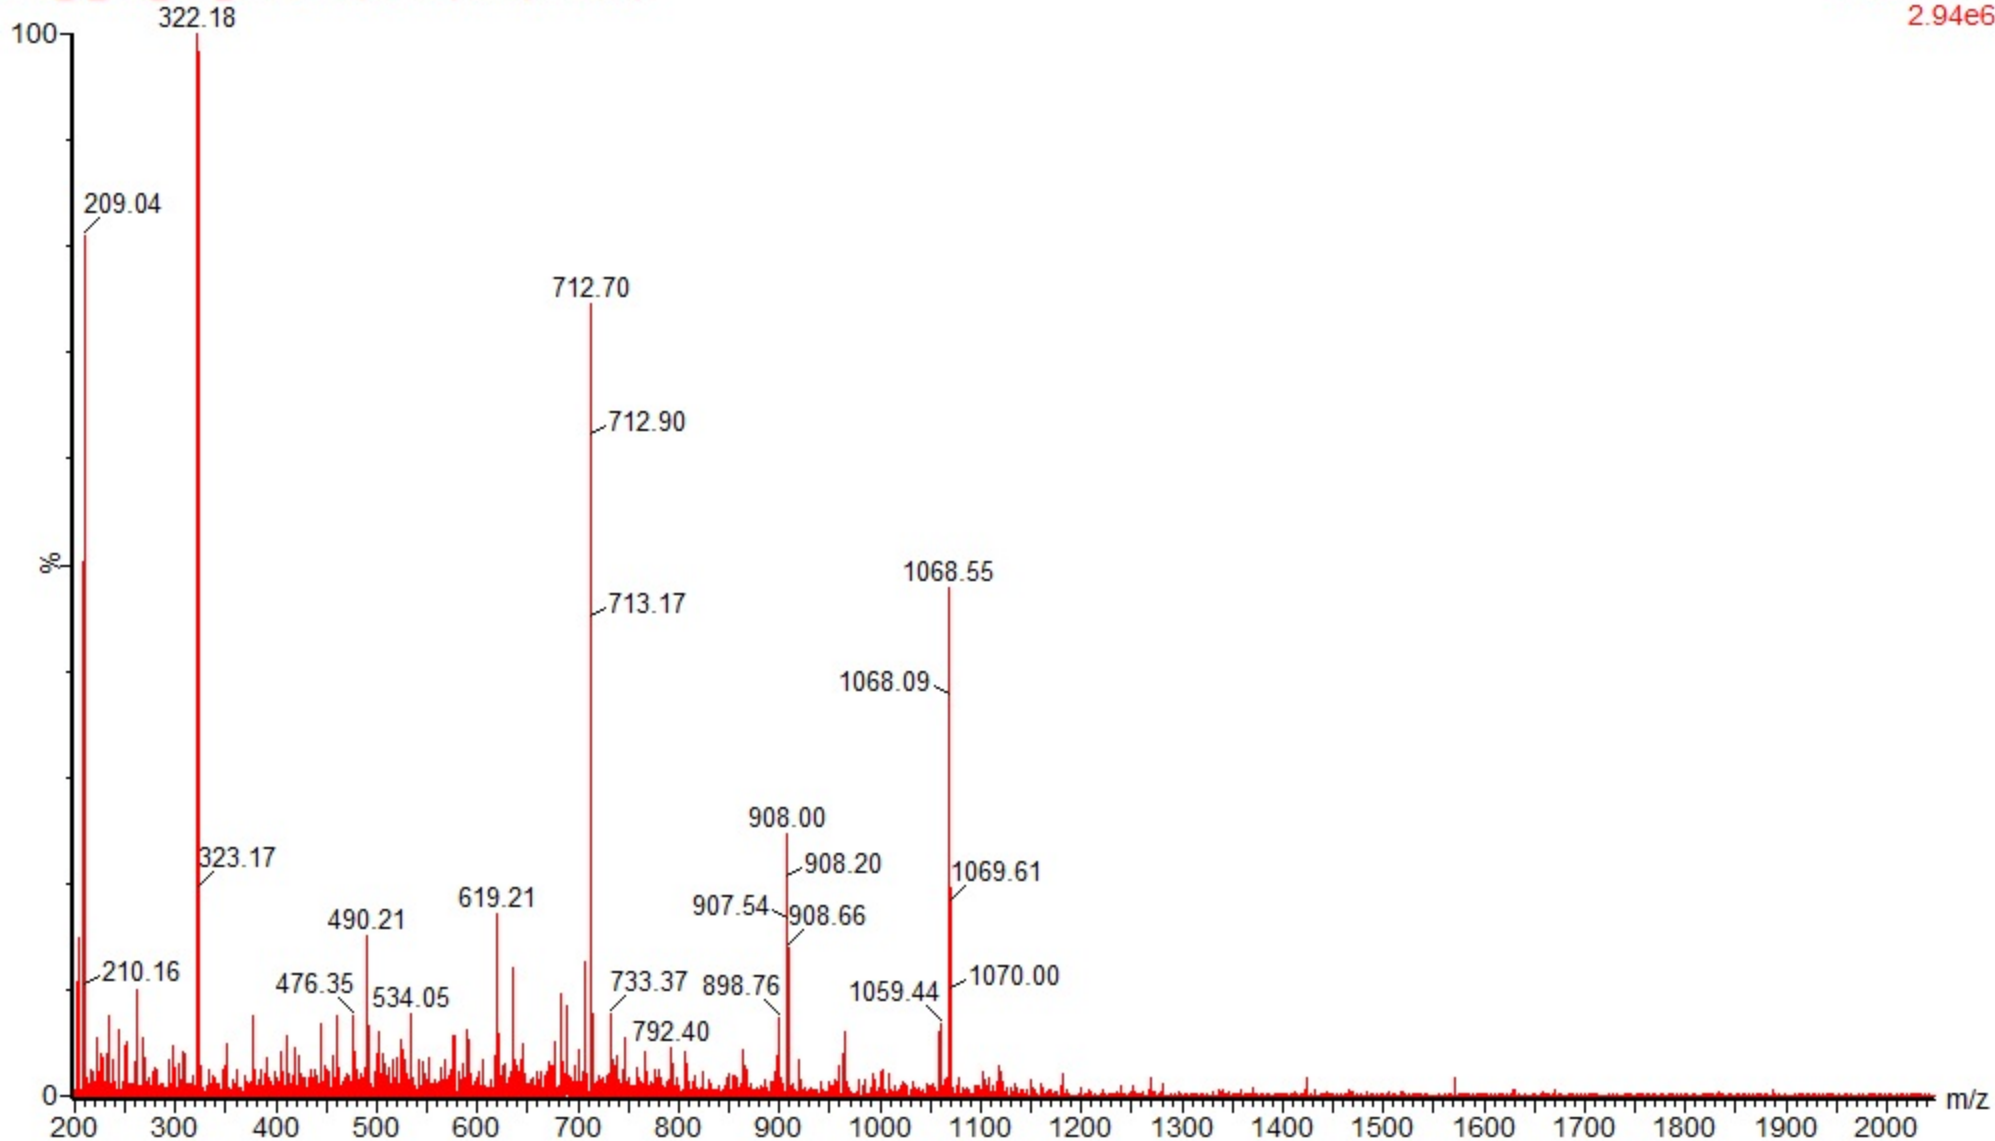

20190214\_3

ZQ LAB 2038

14-Feb-2019

hem\_a\_112\_132\_Fr39 256 (11.517) Cm (252:272)

1: Scan ES+

2.99e7

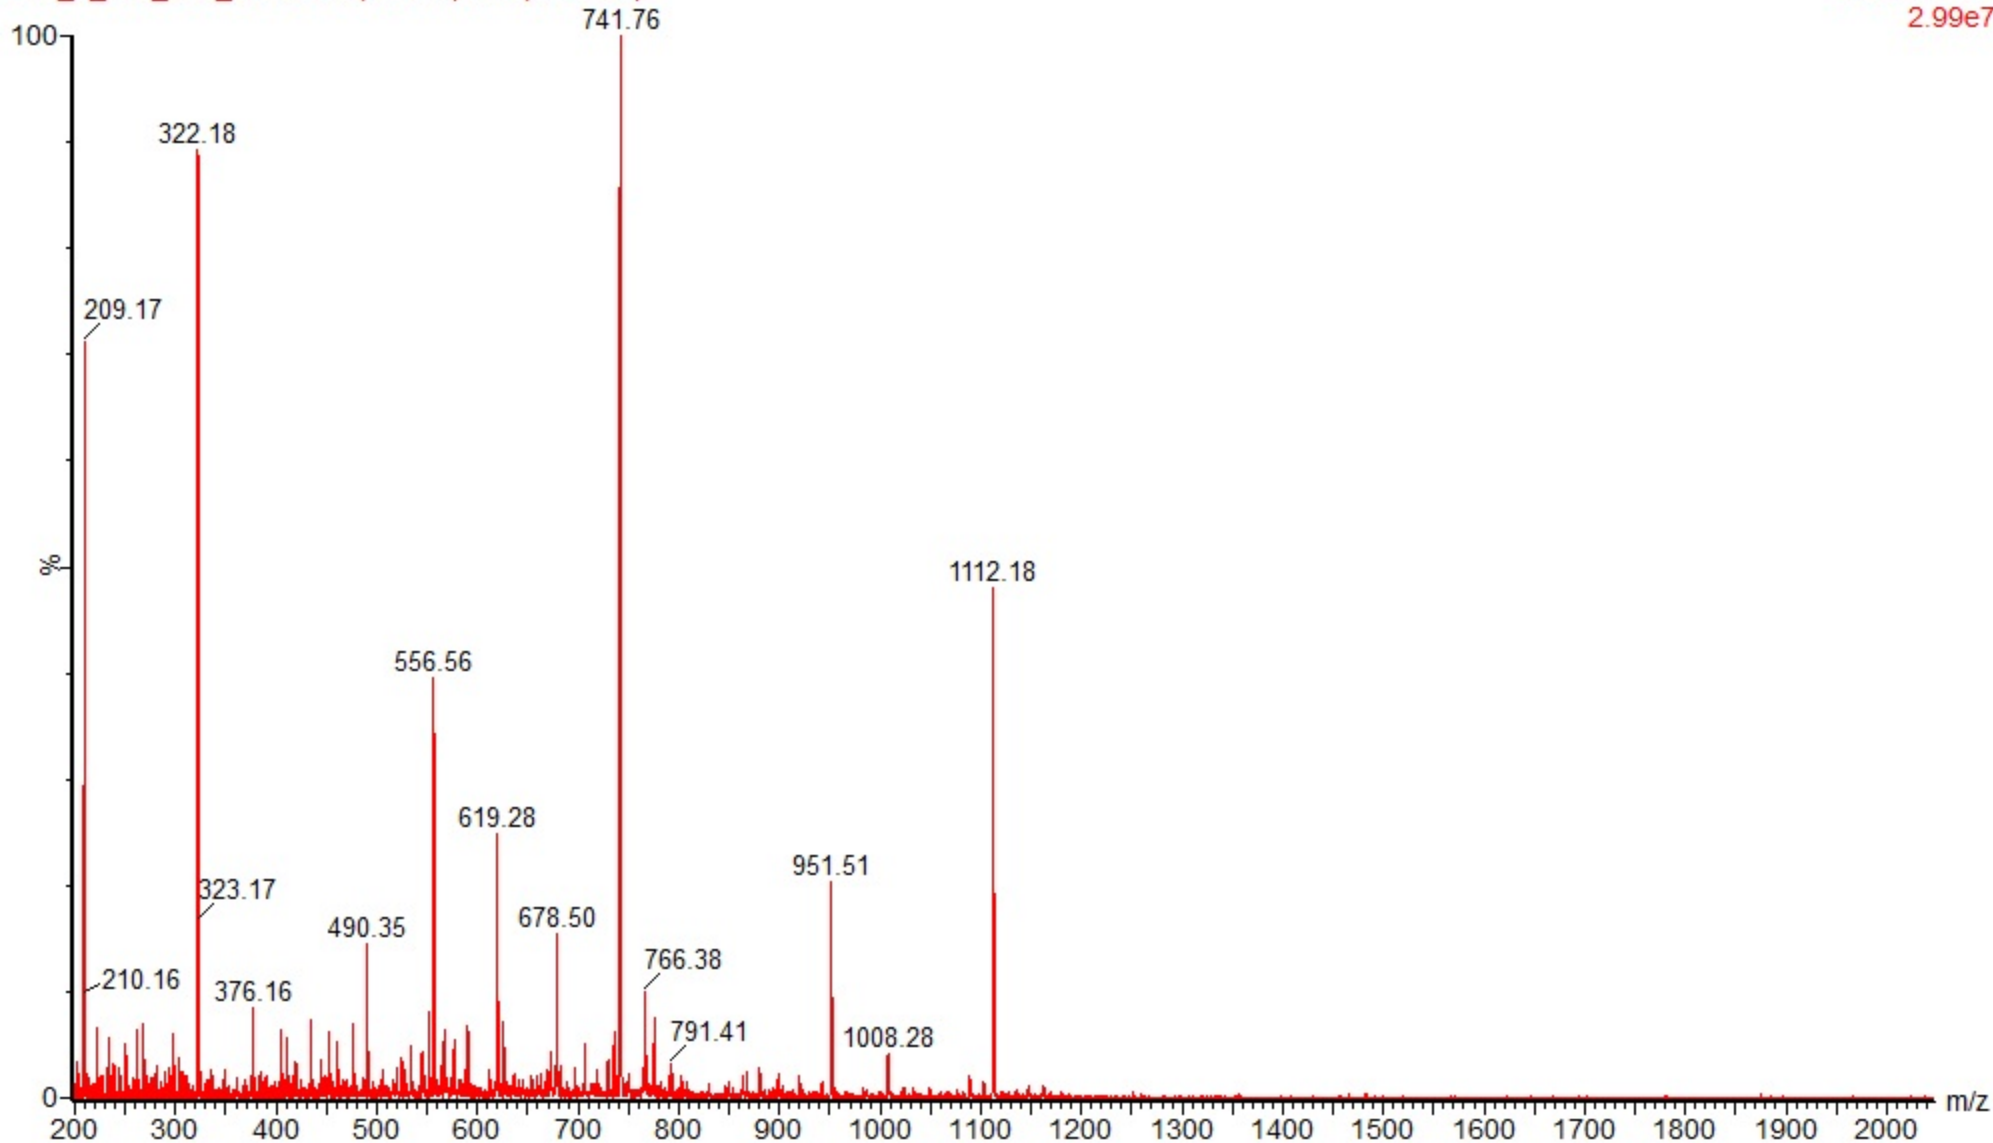

20190218\_1

ZQ LAB 2038

18-Feb-2019

hem\_a\_113\_132\_Fr39 254 (11.427) Cm (244:268)

1: Scan ES+

4.96e7

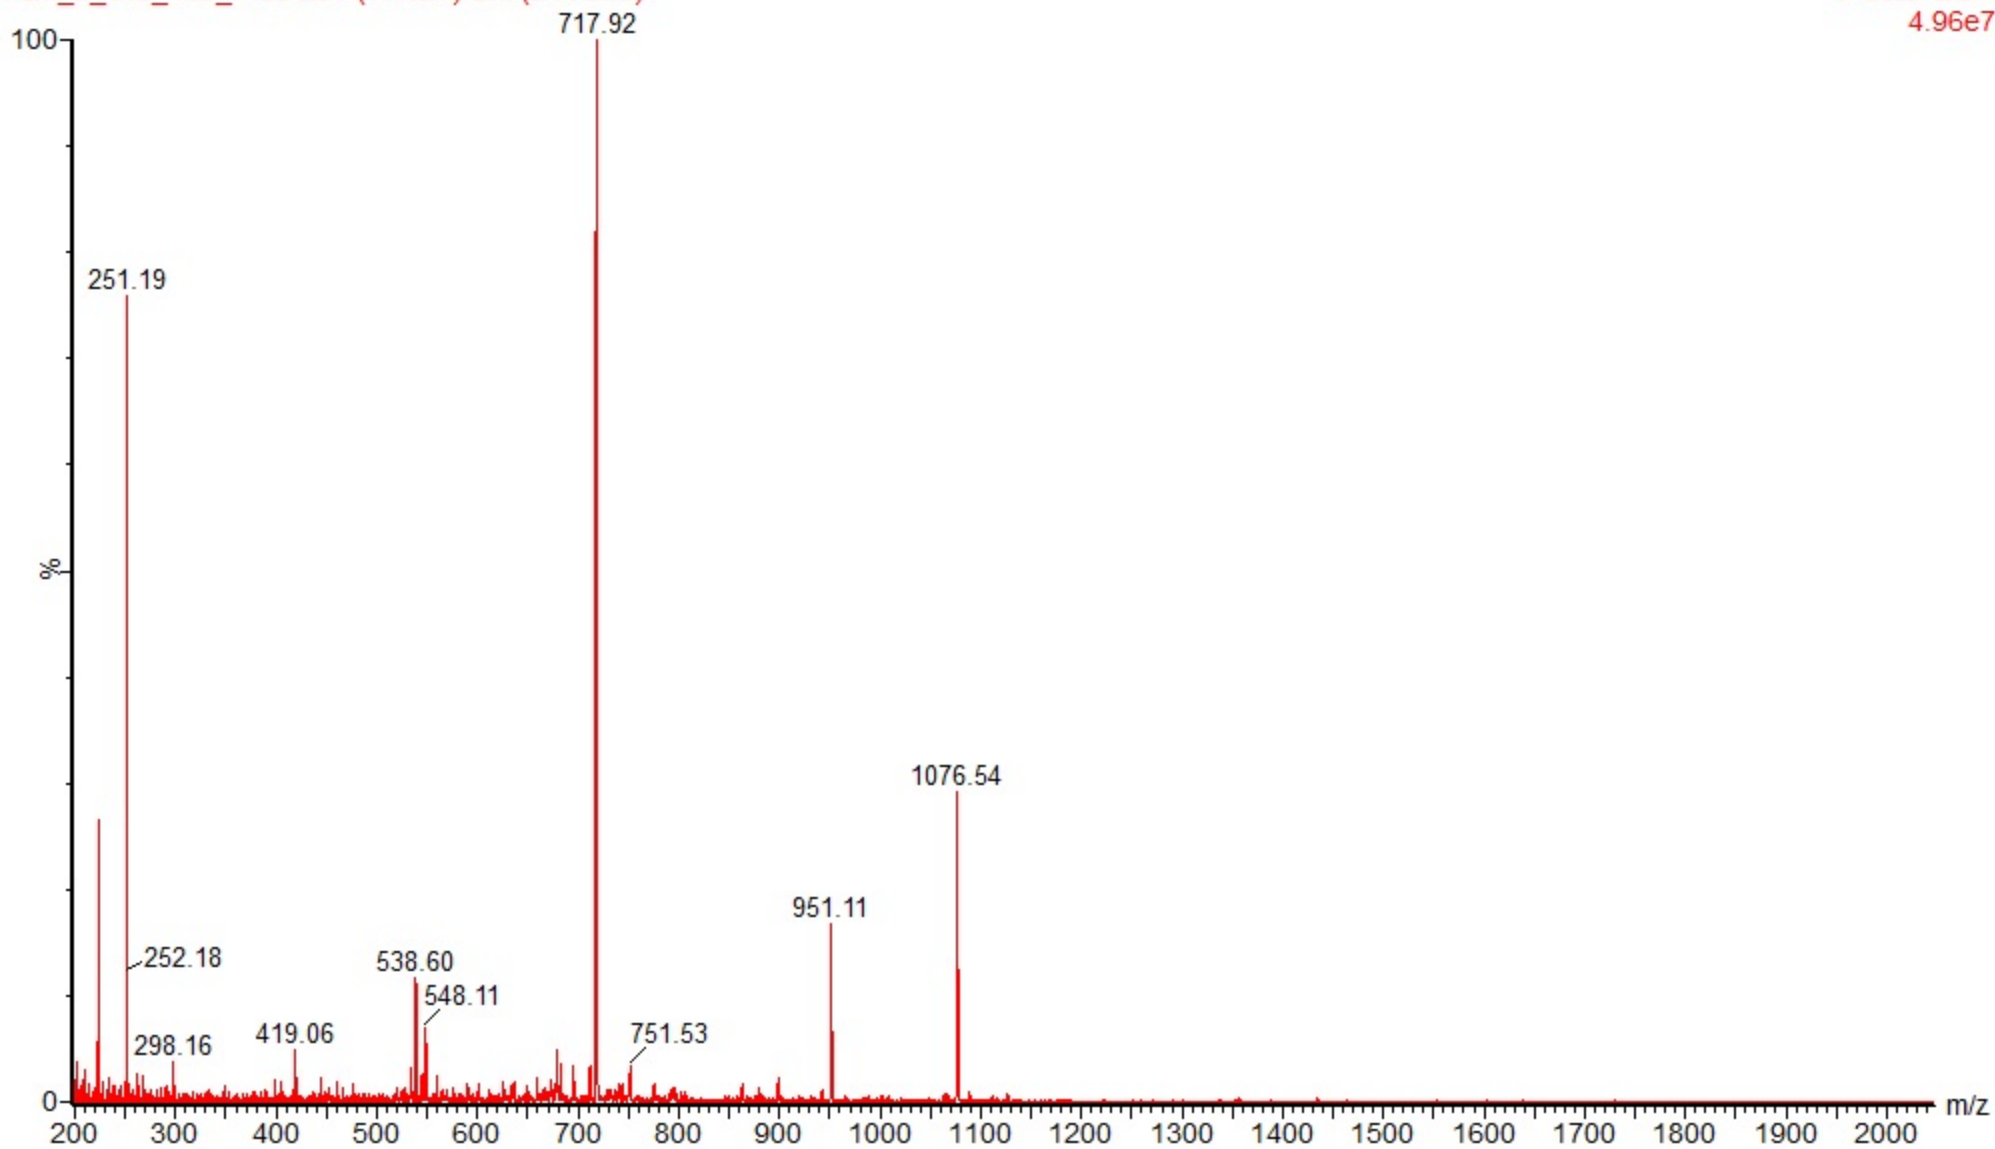



HBA\_Scr02\_120\_132\_Fr38 209 (12.170) Sm (SG, 2x0.50); Cm (205:214)

1: Scan ES+

1.61e7

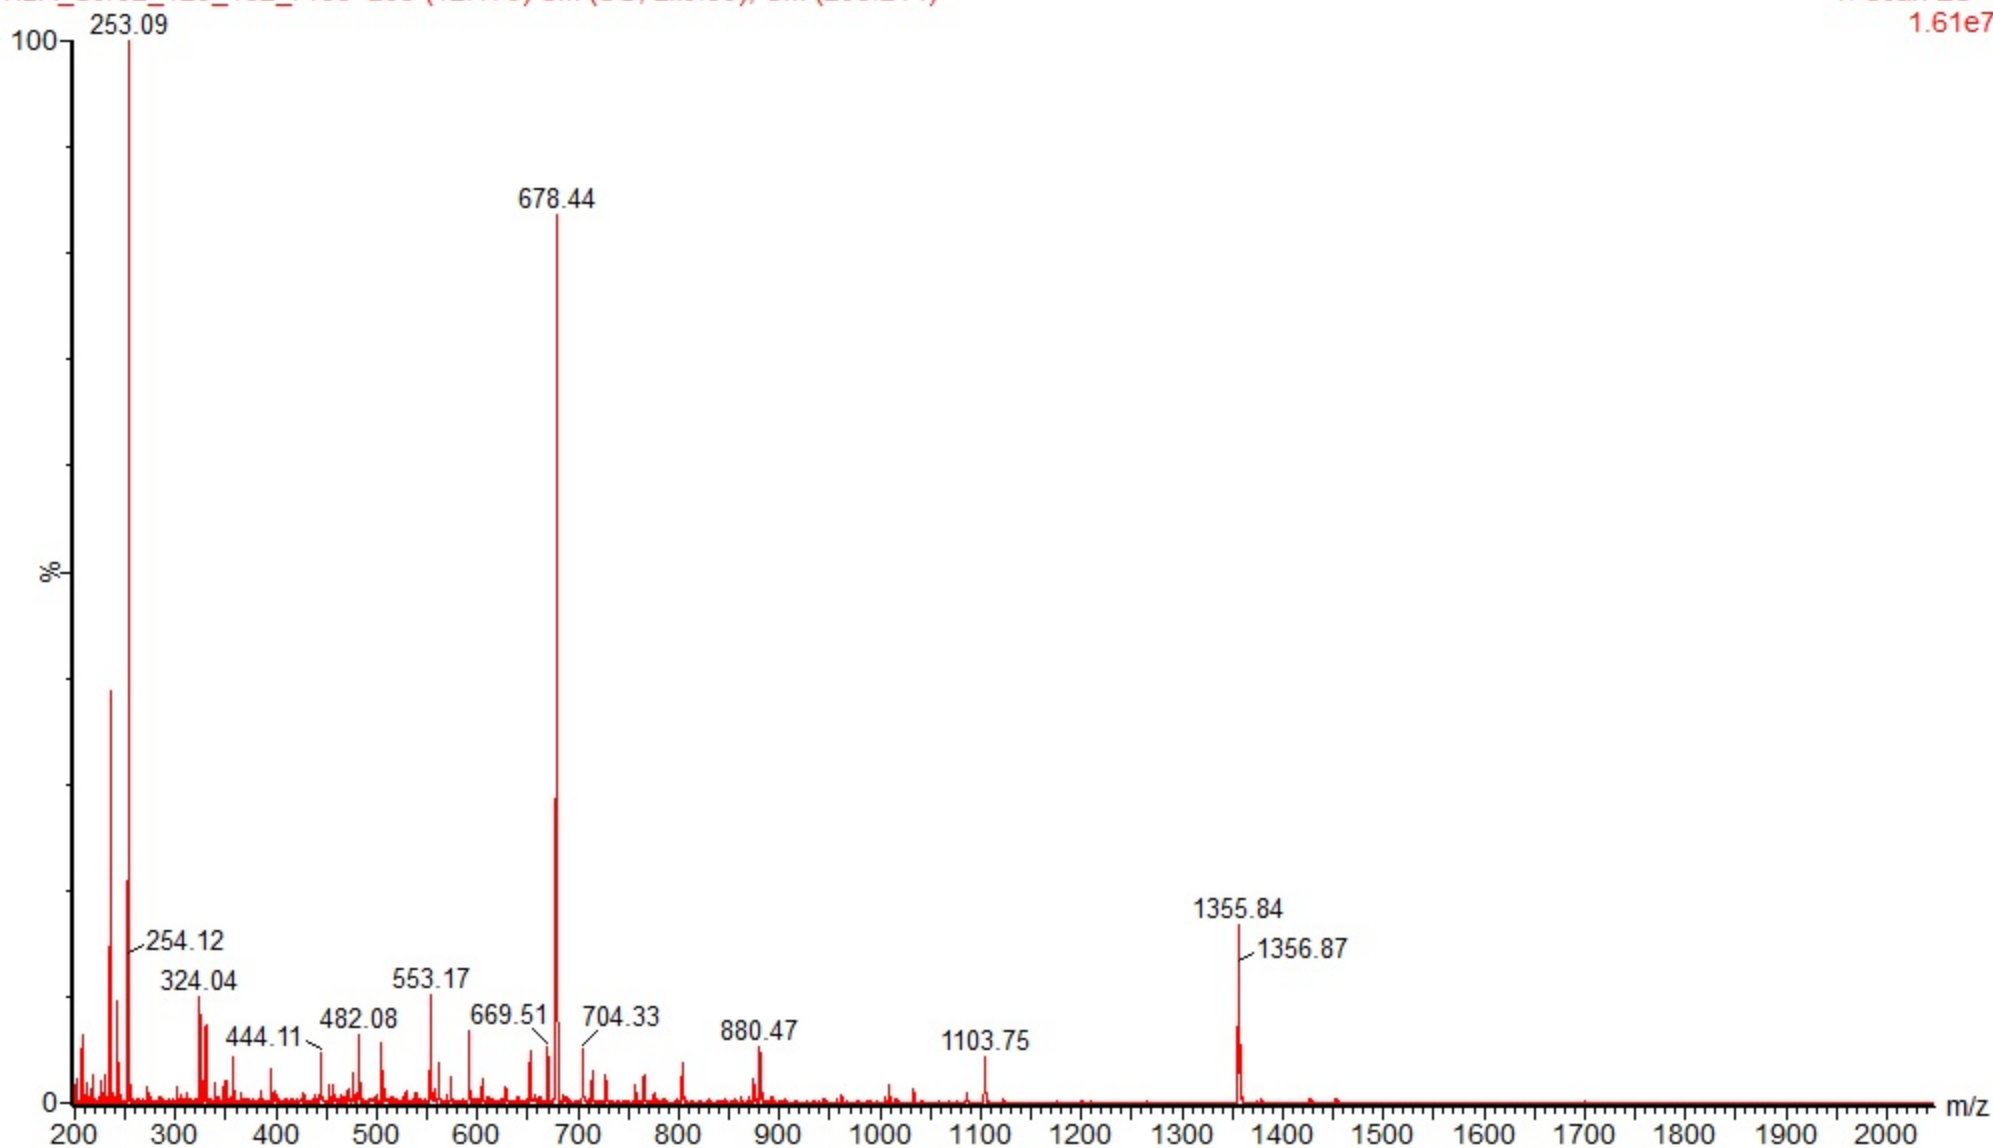

Supplement: 18_2024_5447_MOESM3_ESM.pdf [file 18_2024_5447_MOESM3_ESM.pdf]
